# Supplementary material for: Validation of ELISAs for Isoflavones and Enterolactone for Phytoestrogen Intake Assessment in the French Population
Source: MDPI journal article supplement (doi:10.3390/nu15040967), 2023-02-15
Supplement: s1 [file s1]

# Validation of ELISAs for isoflavones and enterolactone for phytoestrogen intake assessment in the French population

Souad Bensaada<sup>1,2</sup>, Isabelle Raymond<sup>1,3</sup>, Isabelle Pellegrin<sup>1,4</sup>, Jean-François Viallard<sup>1,3</sup> and Bennetau-Pelissero Catherine<sup>1,2,5,\*</sup>

1 University of Bordeaux, 33076 Bordeaux, France

2 ARNA, U1212 Inserm, 5320 CNRS, Pharmacy Faculty, 33076 Bordeaux, France

3 CHU Bordeaux, USN B0 – Hôpital Haut Lévêque – 33604 Pessac, France

4 CHU Bordeaux, Laboratory of Immunology and Immunogenetics, Resources Biological Center (CRB), France

5 Bordeaux Sciences Agro, 33175, Gradignan, France

\*Corresponding author:

Catherine Bennetau-Pelissero

University of Bordeaux,

ARNA, U 1212 Inserm,

146 Léo Saignat Street,

BP12 33076 Bordeaux, France

[catherine.bennetau@laposte.net](mailto:catherine.bennetau@laposte.net)

**Abstract:** Phytoestrogens are dietary compounds with low estrogenic activity. The two main categories in the French diet are isoflavones from pulses and enterolignans metabolized by the gut flora from various lignans found in fruits, vegetables, grains, and beverages. Isoflavones and lignans have different effects on human physiology and can antagonize each other. Comprehensive lists of phytoestrogen sources were constructed based on measurements and literature data. The 24 h and 48 h dietary recalls were proposed to the volunteers of the ISOLED cohort (NCT03421184). Urine and plasma samples from these volunteers were assayed for genistein, daidzein, equol, and enterolactone. A dietary score was constructed considering the pharmacokinetic characteristics of these compounds. Correlation analyses were applied to fluid concentrations associated with dietary scores. Pearson correlations reached 0.921 ( $p < 0.001$ ) for urine<sub>IF</sub>, 0.900 ( $p < 0.001$ ) for plasma<sub>IF</sub>, 0.764 ( $p < 0.001$ ) for urine<sub>ENL</sub>, and 0.723 ( $p < 0.001$ ) for plasma<sub>ENL</sub>. ELISAs associated with careful intake assessments proved to be good tools for phytoestrogens' exposure estimation.

**Keywords:** phytoestrogens; soy isoflavones; enterolactone; plasma; urine; dietary inquiry; exposure assessment

## Abbreviations

DAI: Daidzein;

ED: Endocrine disruptor,

ENL: Enterolactone;

EQ: Equol;

GEN: Genistein

IFs: Isoflavones

PHYTOs: Phytoestrogens

## List of supplementary data

**Table S1.** Sources of ENL precursors according to previous analytical studies

**Table S2.** Dietary scales used to calculate dietary scores for DAI, GEN and ENL. **Table S2A**, Scales for DAI and GEN associated with urine determination; **Table S2B**, Scales for DAI and GEN associated with plasma determination, **Table S2C**, Scales for ENL associated with urine determination. **Table S2D**, Scales for ENL associated with plasma determination.

**Figure S1.** Consort diagram of the recruitment of volunteers at the time of the study and samples collected and inquiry completed.

**Figure S2.** Correlation between urinary DAI and GEN and their respective dietary scores. **Fig S2A:** correlation between urinary DAI concentrations and the corresponding dietary scores. **Fig S2B:** correlation between urinary GEN concentrations and the corresponding dietary scores.

**Figure S3.** Correlation between plasma DAI and GEN and their respective dietary scores. **Fig S3A:** correlation between plasma DAI concentrations and the corresponding dietary scores. **Fig S3B:** correlation between plasma GEN concentrations and the corresponding dietary scores.

**Figure S4.** Correlation between urine and plasma IFs concentrations.

**Figure S5.** Correlation between ENL and IFs data. **Fig S5A.** correlation based on PHYTOs urine concentrations; **Fig S5B.** correlation based on PHYTOs dietary scores.

**Supplementary Document SD1.** Open questionnaire proposed for the last 24 hours recall.

**Supplementary Document SD2.** Example of an inform consent form (translated in English)

**Table S1.** Sources of ENL precursors according to previous analytical studies

| Fruits & Vegetables | Secoisolariciresinol<br>(CAS 148244-82-0) | Matairesinol<br>(CAS 580-72-3) | Lariciresinol<br>(CAS 27003-73-2) | Pinoresinol<br>(CAS 487-36-5) | Syringaresinol<br>(CAS 21453-69-0) | Medioresinol<br>(CAS 40957-99-1) | Total  | References                 |
|---------------------|-------------------------------------------|--------------------------------|-----------------------------------|-------------------------------|------------------------------------|----------------------------------|--------|----------------------------|
|                     | µg/100g fresh weight                      |                                |                                   |                               |                                    |                                  |        |                            |
| <b>Fruits</b>       |                                           |                                |                                   |                               |                                    |                                  |        |                            |
| Abricot             | 31.00                                     | 0.00                           | 105.00                            | 314.00                        | na                                 | na                               | 450.00 | Milder et al., 2005        |
| Apple               | na                                        | 3.00                           | 55.00                             | na                            | na                                 | na                               | 58.00  | Penalvo et al., 2008       |
| Apricots dry        | 328.3                                     | tr                             | na                                | na                            | na                                 | na                               | 328.30 | Horn-Ross et al., 2000     |
| Apricots dry        | 147.60                                    | 0.60                           | 62.10                             | 190.10                        | na                                 | na                               | 399.10 | Thompson et al., 2006      |
| Almond              | 70.30                                     | 0.30                           | 32.20                             | 9.00                          | na                                 | na                               | 111.80 | Thompson et al., 2006      |
| Ananas              | 7.00                                      | 18.00                          | 24.00                             | 3.00                          | na                                 | na                               | 52.00  | Penalvo et al., 2008       |
| Banana              | nd                                        | 17.00                          | na                                | 19.00                         | na                                 | na                               | 36.00  | Penalvo et al., 2008       |
| Cherry              | 6.00                                      | 0.00                           | 41.00                             | 100.00                        | na                                 | na                               | 147.00 | Milder et al., 2005        |
| Chestnuts           | 201.00                                    | 13.00                          | na                                | na                            | na                                 | na                               | 214.00 | Kuhnle et al. 2009         |
| Chestnuts           | 172.7                                     | 0.5                            | 7.8                               | 5.6                           | na                                 | na                               | 186.60 | Thompson et al., 2006      |
| Chestnuts cooked    | 265.00                                    | 15.00                          | na                                | na                            | na                                 | na                               | 280.00 | Kuhnle et al. 2009         |
| Dates               | 161.00                                    | 3.00                           | na                                | na                            | na                                 | na                               | 164.00 | Kuhnle et al., 2009        |
| Dates               | 581.00                                    | 3.00                           | na                                | na                            | na                                 | na                               | 584.00 | Kuhnle et al., 2009        |
| Dates               | 156.00                                    | 2.00                           | na                                | na                            | na                                 | na                               | 158.00 | Kuhnle et al., 2009        |
| Date dry            | 106.2                                     | 0.3                            | 116.9                             | 100.2                         | na                                 | na                               | 323.60 | Thompson et al., 2006      |
| Figs                | 372.00                                    | 3.00                           | na                                | na                            | na                                 | na                               | 375.00 | Kuhnle et al., 2009        |
| Figs dry            | 113.00                                    | 1.00                           | na                                | na                            | na                                 | na                               | 114.00 | Kuhnle et al., 2009        |
| Greengage           | 102.00                                    | 1.00                           | na                                | na                            | na                                 | na                               | 103.00 | Kuhnle et al., 2009        |
| Grenad              | 294.00                                    | 9.00                           | na                                | na                            | na                                 | na                               | 303.00 | Kuhnle et al., 2009        |
| Kiwi fruits         | 174.6                                     | 1.2                            | na                                | na                            | na                                 | na                               | 175.80 | Valsta et al., 2003        |
| Kiwi fruits         | 107.00                                    | 4.00                           | na                                | na                            | na                                 | na                               | 111.00 | Kuhnle et al., 2009        |
| Kiwi fruits         | 112.00                                    | 0.00                           | 17.00                             | 0.00                          | na                                 | na                               | 129.00 | Milder et al., 2005        |
| Kiwi fruits         | 106.00                                    | na                             | 20.00                             | 13.00                         | na                                 | na                               | 139.00 | Penalvo et al., 2008       |
| Lingonberries       | 140.00                                    | nd                             | 19.00                             | 586.00                        | na                                 | na                               | 745.00 | Nurmi et al., 2010         |
| Loquat              | 0.28                                      | 0.00                           | 6.9                               | 179.99                        | 23.43                              | 9.00                             | 219.60 | Moreno-Franco et al., 2011 |
| Nashi               | 7.00                                      | na                             | 21.00                             | na                            | na                                 | na                               | 28.00  | Penalvo et al., 2008       |
| Nectarine           | 18.00                                     | 0.00                           | 41.00                             | 131.00                        | na                                 | na                               | 190.00 | Milder et al., 2005        |
| Peaches             | 11.00                                     | na                             | 38.00                             | 83.00                         | na                                 | na                               | 132.00 | Penalvo et al., 2008       |
| Peaches             | 27.00                                     | 0.00                           | 80.00                             | 186.00                        | na                                 | na                               | 293.00 | Milder et al., 2005        |
| Peaches             | 28.00                                     | nd                             | na                                | na                            | na                                 | na                               | 28.00  | Horn-Ross et al., 2000     |
| Pears               | 2.00                                      | na                             | 34.00                             | 2.00                          | na                                 | na                               | 38.00  | Penalvo et al., 2008       |
| Pears               | 9.90                                      | 0.70                           | na                                | na                            | na                                 | na                               | 10.60  | Valsta et al., 2003        |
| Pears               | 4.00                                      | 0.00                           | 155.00                            | 34.00                         | na                                 | na                               | 193.00 | Milder et al., 2005        |

| Fruits & Vegetables  | Secoisolariciresinol<br>(CAS 148244-82-0) | Matairesinol<br>(CAS 580-72-3) | Lariciresinol<br>(CAS 27003-73-2) | Pinoresinol<br>(CAS 487-36-5) | Syringaresinol<br>(CAS 21453-69-0) | Medioresinol<br>(CAS 40957-99-1) | Total   | References                 |
|----------------------|-------------------------------------------|--------------------------------|-----------------------------------|-------------------------------|------------------------------------|----------------------------------|---------|----------------------------|
| µg/100g fresh weight |                                           |                                |                                   |                               |                                    |                                  |         |                            |
| <b>Fruits</b>        |                                           |                                |                                   |                               |                                    |                                  |         |                            |
| Plums                | 16.00                                     | na                             | 20.00                             | 42.00                         | na                                 | na                               | 78.00   | Penalvo et al., 2008       |
| Plums cooked         | 352.00                                    | 4.00                           | na                                | na                            | na                                 | na                               | 356.00  | Kuhnle et al., 2009        |
| Plums cooked & dried | 105.00                                    | <1                             | na                                | na                            | na                                 | na                               | 105.00  | Kuhnle et al., 2009        |
| Plums half dried     | 278.00                                    | 3.00                           | na                                | na                            | na                                 | na                               | 281.00  | Kuhnle et al., 2009        |
| Plums dried          | 103.8                                     | 0.2                            | 2.1                               | 71.5                          | na                                 | na                               | 177.60  | Thompson et al., 2006      |
| Plums dried yellow   | 150.00                                    | <1                             | na                                | na                            | na                                 | na                               | 150.00  | Kuhnle et al., 2009        |
| Plums                | 76.00                                     | tr                             | na                                | na                            | na                                 | na                               | 76.00   | Horn-Ross et al., 2000     |
| Raisins              | tr                                        | 52.00                          | na                                | na                            | na                                 | na                               | 52.00   | Horn-Ross et al., 2000     |
| Raisins              | 2.00                                      | 1.3                            | na                                | na                            | na                                 | na                               | 3.30    | Valsta et al., 2003        |
| Raisins white        | 9.00                                      | 19.00                          | 153.00                            | 0.00                          | na                                 | na                               | 181.00  | Milder et al., 2005        |
| Raisins blue         | 8.00                                      | 18.00                          | 118.00                            | 0.00                          | na                                 | na                               | 144.00  | Milder et al., 2005        |
| Rosehip berry        | 78.8                                      | 2.00                           | na                                | na                            | na                                 | na                               | 81.00   | Valsta et al., 2003        |
| <b>Citrus</b>        |                                           |                                |                                   |                               |                                    |                                  |         |                            |
| Bitter orange        | 26.00                                     | na                             | 192.00                            | 654.00                        | na                                 | na                               | 872.00  | Penalvo et al., 2008       |
| Grapefruits          | nd                                        | tr                             | na                                | na                            | na                                 | na                               | 0.00    | Horn-Ross et al., 2000     |
| Grapefruits          | 26.30                                     | 0.00                           | na                                | na                            | na                                 | na                               | 26.30   | Valsta et al., 2003        |
| Grapefruits          | 9.00                                      | 2.00                           | 95.00                             | 45.00                         | na                                 | na                               | 151.00  | Milder et al., 2005        |
| Navelle orange       | 14.00                                     | na                             | 128.00                            | 24.00                         | na                                 | na                               | 166.00  | Penalvo et al., 2008       |
| Orange (juice)       | tr                                        | tr                             | na                                | na                            | na                                 | na                               | 0.00    | Horn-Ross et al., 2000     |
| Valencia orange      | 56.00                                     | na                             | 193.00                            | 51.00                         | na                                 | na                               | 300.00  | Penalvo et al., 2008       |
| <b>Vegetables</b>    |                                           |                                |                                   |                               |                                    |                                  |         |                            |
| Advocate             | 47.00                                     | 6.00                           | 31.00                             | 272.00                        | na                                 | na                               | 356.00  | Penalvo et al., 2008       |
| Artichoke            | 171.45                                    | 0.00                           | 153.76                            | 3479.71                       | 21.89                              | 56.65                            | 3883.47 | Moreno-Franco et al., 2011 |
| Asparagus            | 743.00                                    | 14.00                          | 92.00                             | na                            | na                                 | na                               | 849.00  | Penalvo et al., 2008       |
| Asparagus green      | 78.30                                     | 3.40                           | na                                | na                            | na                                 | na                               | 81.70   | Valsta et al., 2003        |
| Asparagus white      | 28.70                                     | 0.60                           | na                                | na                            | na                                 | na                               | 29.30   | Valsta et al., 2003        |
| Asparagus            | 68.00                                     | tr                             | na                                | na                            | na                                 | na                               | 68.00   | Horn-Ross et al., 2000     |
| Bamboo sprouts       | 38.00                                     | na                             | na                                | na                            | na                                 | na                               | 38.00   | Penalvo et al., 2008       |
| Beet                 | 8.00                                      | 0.00                           | na                                | na                            | na                                 | na                               | 8.00    | Valsta et al., 2003        |
| Carrots              | 38.00                                     | tr                             | na                                | na                            | na                                 | na                               | 38.00   | Horn-Ross et al., 2000     |
| Carrots              | 18.00                                     | 0.00                           | 64.00                             | 37.00                         | na                                 | na                               | 119.00  | Milder et al., 2005        |
| Carrots cooked       | 107.00                                    | 3.00                           | na                                | na                            | na                                 | na                               | 110.00  | Kuhnle et al., 2009        |
| Carrots in can       | 47.00                                     | 1.00                           | na                                | na                            | na                                 | na                               | 48.00   | Kuhnle et al., 2009        |
| Celery               | 12.00                                     | na                             | 16.00                             | 43.00                         | na                                 | na                               | 71.00   | Penalvo et al., 2008       |
| Celery               | 9.90                                      | 0.00                           | na                                | na                            | na                                 | na                               | 9.90    | Valsta et al., 2003        |



| Fruits & Vegetables    | Secoisolariciresinol<br>(CAS 148244-82-0) | Matairesinol<br>(CAS 580-72-3) | Lariciresinol<br>(CAS 27003-73-2) | Pinoresinol<br>(CAS 487-36-5) | Syringaresinol<br>(CAS 21453-69-0) | Medioresinol<br>(CAS 40957-99-1) | Total  | References                 |
|------------------------|-------------------------------------------|--------------------------------|-----------------------------------|-------------------------------|------------------------------------|----------------------------------|--------|----------------------------|
| µg/100g fresh weight   |                                           |                                |                                   |                               |                                    |                                  |        |                            |
| <b>Vegetables</b>      |                                           |                                |                                   |                               |                                    |                                  |        |                            |
| Cherry tomatoes        | 17.00                                     | na                             | 43.00                             | 11.00                         | na                                 | na                               | 71.00  | Penalvo et al., 2008       |
| Cherry tomatoes        | 16.00                                     | na                             | 38.00                             | 19.00                         | na                                 | na                               | 73.00  | Penalvo et al., 2008       |
| Corn                   | 125.00                                    | 21.00                          | 69.00                             | 33.00                         | 220.00                             | nd                               | 468.00 | Smeds et al., 2007         |
| Corn (dwarf)           | na                                        | na                             | 25.00                             | 16.00                         | na                                 | na                               | 41.00  | Penalvo et al., 2008       |
| Corn (dwarf)           | 7.00                                      | na                             | 14.00                             | na                            | na                                 | na                               | 21.00  | Penalvo et al., 2008       |
| Corn (grilled)         | 14.46                                     | 0.00                           | 15.33                             | 0.00                          | 331.55                             | 3.01                             | 364.35 | Moreno-Franco et al., 2011 |
| Eggplant               | 8.00                                      | na                             | 40.00                             | 51.00                         | na                                 | na                               | 99.00  | Penalvo et al., 2008       |
| Leek                   | 11.80                                     | 0.00                           | na                                | na                            | na                                 | na                               | 11.80  | Valsta et al., 2003        |
| Onions, leek, garlic   | 34.00                                     | 0.00                           | 153.00                            | 100.00                        | na                                 | na                               | 287.00 | Tetens et al., 2013        |
| Pasta Cooked           | 4.00                                      | 0.00                           | 7.00                              | 5.00                          | na                                 | na                               | 16.00  | Tetens et al., 2013        |
| Potato, chips          | <1.00                                     | 2.00                           | na                                | na                            | na                                 | na                               | 3.00   | Kuhnle et al., 2009b       |
| Potato, chips (Oven)   | 3.00                                      | 1.00                           | na                                | na                            | na                                 | na                               | 4.00   | Kuhnle et al., 2009b       |
| Potato, crisps         | 14.00                                     | 2.00                           | na                                | na                            | na                                 | na                               | 17.00  | Kuhnle et al., 2009b       |
| Potato, (Boiled)       | <1.00                                     | <1.00                          | na                                | na                            | na                                 | na                               | 1.00   | Kuhnle et al., 2009b       |
| Potato, (Boiled)       | <1.00                                     | <1.00                          | na                                | na                            | na                                 | na                               | <1.00  | Kuhnle et al., 2009b       |
| Potato, mashed, instar | 1.00                                      | <1.00                          | na                                | na                            | na                                 | na                               | 1.00   | Kuhnle et al., 2009b       |
| Potatoes               | 4.00                                      | 2.00                           | 0.00                              | 10.00                         | na                                 | na                               | 16.00  | Tetens et al., 2013        |
| Salad (Lettuce)        | 105.60                                    | 0.6                            | na                                | na                            | na                                 | na                               | 106.20 | Valsta et al., 2003        |
| Spinach                | 8.00                                      | na                             | 110.00                            | 31.00                         | na                                 | na                               | 149.00 | Penalvo et al., 2008       |
| Spinach                | 13.00                                     | 1.00                           | 79.00                             | 15.00                         | na                                 | na                               | 108.00 | Penalvo et al., 2008       |
| Sweet potatoes         | 65.00                                     | 2.00                           | 79.00                             | 16.00                         | na                                 | na                               | 162.00 | Penalvo et al., 2008       |
| Sweet potatoes         | 122.00                                    | <1                             | na                                | na                            | na                                 | na                               | 122.00 | Kuhnle et al., 2009        |
| Sweet potatoes cooked  | 132.00                                    | <1                             | na                                | na                            | na                                 | na                               | 132.00 | Kuhnle et al., 2009        |
| Sweet potatoes         | nd                                        | 41.00                          | na                                | na                            | na                                 | na                               | 41.00  | Horn-Ross et al., 2000     |
| Tomato                 | 3.00                                      | na                             | 11.00                             | 12.00                         | na                                 | na                               | 26.00  | Penalvo et al., 2008       |
| Tomato (paste)         | 9.00                                      | 0.00                           | 107.00                            | 70.00                         | na                                 | na                               | 186.00 | Milder et al., 2005        |
| <b>Mushrooms</b>       |                                           |                                |                                   |                               |                                    |                                  |        |                            |
| Ceps                   | 0.60                                      | 0.30                           | na                                | na                            | na                                 | na                               | 0.90   | Valsta et al., 2003        |
| Chanterels             | 3.90                                      | 7.30                           | na                                | na                            | na                                 | na                               | 11.20  | Valsta et al., 2003        |
| Black trumpets         | 1.30                                      | 0.10                           | na                                | na                            | na                                 | na                               | 1.40   | Valsta et al., 2003        |
| Shiitake               | 0.20                                      | 0.00                           | na                                | na                            | na                                 | na                               | 0.20   | Valsta et al., 2003        |

| Fruits & Vegetables    | Secoisolariciresinol<br>(CAS 148244-82-0) | Matairesinol<br>(CAS 580-72-3) | Lariciresinol<br>(CAS 27003-73-2) | Pinoresinol<br>(CAS 487-36-5) | Syringaresinol<br>(CAS 21453-69-0) | Medioresinol<br>(CAS 40957-99-1) | Total           | References                 |
|------------------------|-------------------------------------------|--------------------------------|-----------------------------------|-------------------------------|------------------------------------|----------------------------------|-----------------|----------------------------|
| µg/100g fresh weight   |                                           |                                |                                   |                               |                                    |                                  |                 |                            |
| <b>Berries</b>         |                                           |                                |                                   |                               |                                    |                                  |                 |                            |
| Blackberries           | 12.00                                     | nd                             | 166.00                            | 54.00                         | na                                 | na                               | 232.00          | Nurmi et al., 2010         |
| Blackberries           | 220.00                                    | nd                             | na                                | na                            | na                                 | na                               | 220.00          | Kuhnle et al., 2009        |
| Cranberry              | 193.00                                    | nd                             | 69.00                             | 122.00                        | na                                 | na                               | 384.00          | Nurmi et al., 2010         |
| Currants               | 119.00                                    | 2.00                           | na                                | na                            | na                                 | na                               | 121.00          | Kuhnle et al., 2009        |
| Strawberries           | 51.00                                     | na                             | 33.00                             | 21.00                         | na                                 | na                               | 105.00          | Penalvo et al., 2008       |
| Strawberries           | 5.00                                      | nd                             | 117.00                            | 212.00                        | na                                 | na                               | 334.00          | Nurmi et al., 2010         |
| Strawberries           | 5.00                                      | 0.00                           | 117.00                            | 212.00                        | na                                 | na                               | 334.00          | Milder et al., 2005        |
| Strawberry             | 5.00                                      | 0.00                           | 117.00                            | 212.00                        | na                                 | na                               | 334.00          | Tetens et al., 2013        |
| Strawberries           | 61.37                                     | 18.3                           | 134.00                            | 5.21                          | 60.83                              | 3.89                             | 284.49          | Moreno-Franco et al., 2011 |
| <b>Oil seeds</b>       |                                           |                                |                                   |                               |                                    |                                  |                 |                            |
| Olive                  | 55.90                                     | 2.70                           | na                                | na                            | na                                 | na                               | 58.60           | Valsta et al., 2003        |
| Olive oil              | 1.00                                      | 0.30                           | 1.70                              | 139.70                        | na                                 | na                               | 142.70          | Thompson et al., 2006      |
| Olive oil extra virgin | 0.00                                      | 0.00                           | 4.00                              | 243.00                        | na                                 | na                               | 247.00          | Milder et al., 2005        |
| Olive oil standard     | 0.00                                      | 0.00                           | 5.00                              | 101.00                        | na                                 | na                               | 106.00          | Milder et al., 2005        |
| Sunflower seeds        | 128.00                                    | nd                             | na                                | na                            | na                                 | na                               | 128.00          | Horn-Ross et al., 2000     |
| Sunflower seeds        | 26.20                                     | 0.50                           | 149.70                            | 33.90                         | na                                 | na                               | 210.30          | Thompson et al., 2006      |
| Sunflower seeds        | 106.00                                    | 3.00                           | na                                | na                            | na                                 | na                               | 109.00          | Kuhnle et al., 2008        |
| Sunflower seeds        | 53.00                                     | 0.00                           | 671.00                            | 167.00                        | na                                 | na                               | 891.00          | Milder et al., 2005        |
| <b>Nuts</b>            |                                           |                                |                                   |                               |                                    |                                  |                 |                            |
| Almonds                | 159.00                                    | 24.00                          | 233.00                            | 208.00                        | 40.00                              | nd                               | 664.00          | Smeds et al., 2007         |
| Brazil nuts            | 770.00                                    | 12.00                          | na                                | na                            | na                                 | na                               | 782.00          | Kuhnle et al., 2008        |
| <b>Carob</b>           | <b>1266.51</b>                            | <b>108.41</b>                  | <b>1770.74</b>                    | <b>294.99</b>                 | <b>12965.7</b>                     | <b>336.08</b>                    | <b>16742.43</b> | Moreno-Franco et al., 2011 |
| Cashew nuts            | 165.00                                    | 5.00                           | na                                | na                            | na                                 | na                               | 170.00          | Kuhnle et al., 2008        |
| Cashew nuts            | 37.50                                     | 0.30                           | 60.50                             | 1.10                          | na                                 | na                               | 99.40           | Thompson et al., 2006      |
| Cashew nuts            | 133.00                                    | 0.00                           | 496.00                            | 0.00                          | na                                 | na                               | 629.00          | Milder et al., 2005        |
| Cashew nuts            | 316.00                                    | 55.00                          | 307.00                            | 19.00                         | 26.00                              | nd                               | 723.00          | Smeds et al., 2007         |
| Coconuts (powder)      | 34.00                                     | 0.00                           | na                                | na                            | na                                 | na                               | 34.00           | Valsta et al., 2003        |
| Peanuts                | 116.00                                    | 19.00                          | 98.00                             | 32.00                         | 81.00                              | nd                               | 346.00          | Smeds et al., 2007         |
| Peanuts grilled salted | 256.00                                    | 17.00                          | na                                | na                            | na                                 | na                               | 273.00          | Kuhnle et al., 2008        |
| Peanuts grilled salted | 53.00                                     | 0.00                           | 41.00                             | 0.00                          | na                                 | na                               | 94.00           | Milder et al., 2005        |
| Pistachio              | 44.60                                     | 0.10                           | 123.00                            | 31.20                         | na                                 | na                               | 198.90          | Thompson et al., 2006      |
| Walnuts                | 140.00                                    | 5.00                           | na                                | na                            | na                                 | na                               | 145.00          | Kuhnle et al., 2008        |
| Walnuts                | 99.00                                     | 60.00                          | 47.00                             | 34.00                         | 24.00                              | nd                               | 264.00          | Smeds et al., 2007         |

| Fruits & Vegetables  | Secoisolariciresinol<br>(CAS 148244-82-0) | Matairesinol<br>(CAS 580-72-3) | Lariciresinol<br>(CAS 27003-73-2) | Pinoresinol<br>(CAS 487-36-5) | Syringaresinol<br>(CAS 21453-69-0) | Medioresinol<br>(CAS 40957-99-1) | Total  | References                 |
|----------------------|-------------------------------------------|--------------------------------|-----------------------------------|-------------------------------|------------------------------------|----------------------------------|--------|----------------------------|
| µg/100g fresh weight |                                           |                                |                                   |                               |                                    |                                  |        |                            |
| Legumes              |                                           |                                |                                   |                               |                                    |                                  |        |                            |
| Alafalfa sprouts     | tr                                        | nd                             | na                                | na                            | na                                 | na                               | 0.00   | Horn-Ross et al., 2000     |
| Beans                | 66.00                                     | na                             | 128.00                            | 31.00                         | na                                 | na                               | 225.00 | Penalvo et al., 2008       |
| Beans                | 58.00                                     | na                             | 144.00                            | 37.00                         | na                                 | na                               | 239.00 | Penalvo et al., 2008       |
| Beans                | 29.00                                     | 0.00                           | 220.00                            | 24.00                         | na                                 | na                               | 273.00 | Milder et al., 2005        |
| Beans (red)          | nd                                        | nd                             | na                                | na                            | na                                 | na                               | 0.00   | Horn-Ross et al., 2000     |
| Beans (red)          | 240.02                                    | 9.00                           | 422.45                            | 20.85                         | 16.98                              | 2.83                             | 712.13 | Moreno-Franco et al., 2011 |
| Beans (red)          | 240.39                                    | 34.89                          | 319.23                            | 24.67                         | 57.34                              | 4.77                             | 681.29 | Moreno-Franco et al., 2011 |
| Beans (red)          | 153.00                                    | 19.46                          | 218.24                            | 38.00                         | 186.57                             | 20.81                            | 636.08 | Moreno-Franco et al., 2011 |
| Beans (red)          | 139.15                                    | 29.00                          | 92.79                             | 48.86                         | 69.00                              | 19.12                            | 397.92 | Moreno-Franco et al., 2011 |
| Beans (red)          | 92.99                                     | 21.03                          | 88.27                             | 47.39                         | 31.53                              | 15.9                             | 297.11 | Moreno-Franco et al., 2011 |
| Beans (red)          | 167.85                                    | 11.70                          | 32.00                             | 2.90                          | 72.00                              | 2.41                             | 288.86 | Moreno-Franco et al., 2011 |
| Beans (red)          | 140.47                                    | 10.89                          | 248.01                            | 33.43                         | 157.00                             | 19.8                             | 609.60 | Moreno-Franco et al., 2011 |
| Broad beans          | 240.00                                    | 34.89                          | 319.23                            | 24.67                         | 57.34                              | 4.77                             | 681.29 | Moreno-Franco et al., 2011 |
| Clover sprouts       | nd                                        | nd                             | na                                | na                            | na                                 | na                               | 0.00   | Horn-Ross et a., 2000      |
| Humus                | 2.50                                      | 15.50                          | 123.70                            | 834.70                        | na                                 | na                               | 976.40 | Thompson et al., 2006      |
| Lentils              | 1.38                                      | 245.17                         | 233.24                            | 86.93                         | 196.63                             | 17.00                            | 780.35 | Moreno-Franco et al., 2011 |
| Mungo beans          | 289.00                                    | nd                             | na                                | na                            | na                                 | na                               | 289.00 | Kuhnle et al., 2009        |
| Mungo sprouts        | 97.00                                     | 0.1                            | 18.5                              | 13.1                          | na                                 | na                               | 128.70 | Thompson et al., 2006      |
| Mungo sprouts        | 82.00                                     | 1.00                           | 32.00                             | 33.00                         | na                                 | na                               | 148.00 | Penalvo et al., 2008       |
| Mungo sprouts        | tr                                        | tr                             | na                                | na                            | na                                 | na                               | 0.00   | Horn-Ross et al., 2000     |
| Peas                 | 129.00                                    | na                             | 9.00                              | 6.00                          | na                                 | na                               | 144.00 | Penalvo et al., 2008       |
| Peas                 | na                                        | na                             | 59.00                             | 50.00                         | na                                 | na                               | 109.00 | Penalvo et al., 2008       |
| Peas                 | 2.73                                      | 6.79                           | 150.59                            | 79.81                         | 175.36                             | 24.20                            | 439.48 | Moreno-Franco et al., 2011 |
| Peas                 | 1.00                                      | 98.82                          | 83.73                             | 7.11                          | 1.82                               | 0.00                             | 192.63 | Moreno-Franco et al., 2011 |
| Peas                 | 2.61                                      | 87.75                          | 133.75                            | 8.00                          | 1.81                               | 0.00                             | 234.14 | Moreno-Franco et al., 2011 |
| Soy meal             | 79.10                                     | na                             | 99.60                             | 88.70                         | na                                 | na                               | 267.40 | Thompson et al., 2006      |
| Soy meal             | 337.00                                    | 9.00                           | na                                | na                            | na                                 | na                               | 346.00 | Kuhnle et al., 2009        |
| Tofu                 | 18.00                                     | 0.00                           | 61.00                             | 61.00                         | na                                 | na                               | 140.00 | Milder et al., 2005        |
| Cucurbitaceae        |                                           |                                |                                   |                               |                                    |                                  |        |                            |
| Cucumber             | 41.00                                     | na                             | 65.00                             | na                            | na                                 | na                               | 106.00 | Penalvo et al., 2008       |
| Pumkin               | 20.00                                     | na                             | 29.00                             | na                            | na                                 | na                               | 49.00  | Penalvo et al., 2008       |
| Pumkin               | 153.00                                    | <1                             | na                                | na                            | na                                 | na                               | 153.00 | Kuhnle et al. 2009         |
| Pumkin               | 29.00                                     | 3.00                           | 58.00                             | 8.00                          | na                                 | na                               | 98.00  | Penalvo et al., 2008       |
| Pumkin seeds         | 510.00                                    | 11.00                          | na                                | na                            | na                                 | na                               | 521.00 | Kuhnle et al., 2008        |
| Spanish melon        | 23.00                                     | na                             | 69.00                             | 12.00                         | na                                 | na                               | 104.00 | Penalvo et al., 2008       |
| Water melon          | 5.00                                      | na                             | 67.00                             | 5.00                          | na                                 | na                               | 77.00  | Penalvo et al., 2008       |
| Witer squash         | 13.40                                     | 0.10                           | 91.10                             | 8.80                          | na                                 | na                               | 113.40 | Thompson et al., 2006      |
| Zucchini             | 18.00                                     | 0.00                           | 64.00                             | 37.00                         | na                                 | na                               | 119.00 | Milder et al., 2005        |

| Fruits & Vegetables             | Secoisolariciresinol<br>(CAS 148244-82-0) | Matairesinol<br>(CAS 580-72-3) | Lariciresinol<br>(CAS 27003-73-2) | Pinoresinol<br>(CAS 487-36-5) | Syringaresinol<br>(CAS 21453-69-0) | Medioresinol<br>(CAS 40957-99-1) | Total     | References                 |
|---------------------------------|-------------------------------------------|--------------------------------|-----------------------------------|-------------------------------|------------------------------------|----------------------------------|-----------|----------------------------|
| µg/100g fresh weight            |                                           |                                |                                   |                               |                                    |                                  |           |                            |
| <b>Brassicaceae</b>             |                                           |                                |                                   |                               |                                    |                                  |           |                            |
| Broccoli                        | 38.00                                     | 0.00                           | 972.00                            | 315.00                        | na                                 | na                               | 1325.00   | Milder et al., 2005        |
| Broccoli                        | tr                                        | nd                             | na                                | na                            | na                                 | na                               | 0.00      | Horn-Ross et al., 2000     |
| Brussels sprouts                | 30.00                                     | nd                             | na                                | na                            | na                                 | na                               | 30.00     | Horn-Ross et al., 2000     |
| Brussels sprouts                | 21.00                                     | 0.6                            | na                                | na                            | na                                 | na                               | 21.60     | Valsta et al., 2003        |
| Brussels sprouts                | 34.00                                     | 0.00                           | 493.00                            | 220.00                        | na                                 | na                               | 747.00    | Milder et al., 2005        |
| Cabbage red                     | 9.00                                      | 0.00                           | 178.00                            | 90.00                         | na                                 | na                               | 277.00    | Milder et al., 2005        |
| Cabbage white                   | 8.00                                      | 0.00                           | 212.00                            | 568.00                        | na                                 | na                               | 788.00    | Milder et al., 2005        |
| Cauliflower                     | 91.00                                     | na                             | 36.00                             | 85.00                         | na                                 | na                               | 212.00    | Penalvo et al., 2008       |
| Cauliflower                     | 4.00                                      | 0.00                           | 124.00                            | 58.00                         | na                                 | na                               | 186.00    | Milder et al., 2005        |
| Cabbage Kale                    | 16.00                                     | 12.00                          | 599.00                            | 1691.00                       | na                                 | na                               | 2321.00   | Milder et al., 2005        |
| Horseradish                     | 14.00                                     | 0.00                           | na                                | na                            | na                                 | na                               | 14.00     | Valsta et al., 2003        |
| Horseradish                     | 37.00                                     | 49.00                          | 219.00                            | 16.00                         | na                                 | na                               | 321.00    | Penalvo et al., 2008       |
| Radish                          | na                                        | na                             | 29.00                             | 43.00                         | na                                 | na                               | 72.00     | Penalvo et al., 2008       |
| Radish                          | 1.00                                      | 15.00                          | na                                | 40.00                         | na                                 | na                               | 56.00     | Penalvo et al., 2008       |
| Rutabaga                        | 3.70                                      | 0.60                           | na                                | na                            | na                                 | na                               | 4.30      | Valsta et al., 2003        |
| Turnips                         | 6.30                                      | 0.00                           | na                                | na                            | na                                 | na                               | 6.30      | Valsta et al., 2003        |
| <b>Bread grains &amp; meals</b> |                                           |                                |                                   |                               |                                    |                                  |           |                            |
| Barley                          | 42.00                                     | 42.00                          | 133.00                            | 71.00                         | 140.00                             | 22.00                            | 450.00    | Smeds et al., 2007         |
| Buckwheat                       | 350.00                                    | 39.00                          | 505.00                            | 63.00                         | 145.00                             | 16.00                            | 1118.00   | Smeds et al., 2007         |
| Crackers                        | 38.71                                     | 5.26                           | 79.85                             | 244.17                        | 107.02                             | 6.44                             | 481.45    | Moreno-Franco et al., 2011 |
| Croissant                       | 33.10                                     | 0.00                           | 9.99                              | 0.00                          | 73.57                              | 1.89                             | 118.55    | Moreno-Franco et al., 2011 |
| Cereal bar                      | 25.53                                     | 1.42                           | 47.95                             | 142.32                        | 106.91                             | 4.90                             | 469.61    | Moreno-Franco et al., 2011 |
| Cereal chocolate                | 22.25                                     | 1.90                           | 31.71                             | 41.29                         | 145.04                             | 6.03                             | 248.22    | Moreno-Franco et al., 2011 |
| Dhurra                          | 13.00                                     | 1.90                           | 3.80                              | 33.00                         | 90.00                              | nd                               | 141.70    | Smeds et al., 2007         |
| Flax seeds                      | 375321.9                                  | 153.3                          | 2807.5                            | 729.6                         | na                                 | na                               | 379012.30 | Thompson et al., 2006      |
| Flax seeds                      | 294210.00                                 | 553.00                         | 3041.00                           | 3324.00                       | na                                 | na                               | 301128.00 | Milder et al., 2005        |
| French baguette                 | 8.56                                      | 0.00                           | 14.21                             | 11.47                         | 85.83                              | 2.86                             | 122.93    | Moreno-Franco et al., 2011 |
| Grain bread                     | 6163.00                                   | 19.00                          | 185.00                            | 377.00                        | na                                 | na                               | 6744.00   | Milder et al., 2005        |
| linseeds                        | 165759                                    | 529                            | 1780                              | 871                           | 48                                 | nd                               | 168987.00 | Smeds et al., 2007         |
| Linseed bread                   | 7208.30                                   | 1.20                           | 9.80                              | 4.10                          | na                                 | na                               | 7223.40   | Thompson et al., 2006      |
| Linseed bread                   | 11845.00                                  | 26.00                          | 220.00                            | 283.00                        | nq                                 | na                               | 12474.00  | Milder et al., 2005        |
| Millet                          | 80.00                                     | 82.00                          | 34.00                             | 216.00                        | 96.00                              | 12.00                            | 520.00    | Smeds et al., 2007         |
| Muesli 1                        | 17.00                                     | 0.00                           | 250.00                            | 497.00                        | na                                 | na                               | 764.00    | Milder et al., 2005        |
| Muesli 2                        | 13.00                                     | 0.00                           | 120.00                            | 210.00                        | na                                 | na                               | 343.00    | Milder et al., 2005        |
| Muesli 3                        | 17.00                                     | 0.00                           | 63.00                             | 129.00                        | na                                 | na                               | 209.00    | Milder et al., 2005        |
| Oat                             | 90.00                                     | 440.00                         | 766.00                            | 567.00                        | 297.00                             | 112.00                           | 2272.00   | Smeds et al., 2007         |
| Quinoa                          | 30.00                                     | 15.00                          | 125.00                            | 54.00                         | 180.00                             | nd                               | 404.00    | Smeds et al., 2007         |

| Fruits & Vegetables             | Secoisolariciresinol<br>(CAS 148244-82-0) | Matairesinol<br>(CAS 580-72-3) | Lariciresinol<br>(CAS 27003-73-2) | Pinoresinol<br>(CAS 487-36-5) | Syringaresinol<br>(CAS 21453-69-0) | Medioresinol<br>(CAS 40957-99-1) | Total    | References                 |
|---------------------------------|-------------------------------------------|--------------------------------|-----------------------------------|-------------------------------|------------------------------------|----------------------------------|----------|----------------------------|
| µg/100g fresh weight            |                                           |                                |                                   |                               |                                    |                                  |          |                            |
| <b>Bread grains &amp; meals</b> |                                           |                                |                                   |                               |                                    |                                  |          |                            |
| Rice (Japanese)                 | 39.00                                     | nd                             | 757.00                            | 503.00                        | 967.00                             | 74.00                            | 2340.00  | Smeds et al., 2007         |
| Rice (wild)                     | 46.00                                     | 1.22                           | 55.00                             | 194.00                        | 1116.00                            | 92.00                            | 1504.22  | Smeds et al., 2007         |
| Rice (red)                      | 66.00                                     | 87.00                          | 71.00                             | 60.00                         | 160.00                             | 24.00                            | 468.00   | Smeds et al., 2007         |
| Rice (brown)                    | 20.00                                     | 1.60                           | 153.00                            | 66.00                         | 99.00                              | 27.00                            | 366.60   | Smeds et al., 2007         |
| Rice bread                      | 33.00                                     | 4.00                           | 47.00                             | 44.00                         | na                                 | na                               | 128.00   | Penalvo et al., 2008       |
| Rice bread                      | 7.00                                      | 1.00                           | 18.00                             | 16.00                         | na                                 | na                               | 42.00    | Penalvo et al., 2008       |
| Refined bread                   | 17.00                                     | 0.00                           | 38.00                             | 28.00                         | na                                 | na                               | 83.00    | Milder et al., 2005        |
| Rye                             | 462.00                                    | 729.00                         | 1503.00                           | 1547.00                       | 3540.00                            | 585.00                           | 8639.00  | Smeds et al., 2007         |
| Rye bread                       | 122.00                                    | 0.20                           | 11.40                             | 9.40                          | na                                 | na                               | 143.00   | Thompson et al., 2006      |
| Rye bread                       | 16.00                                     | 14.00                          | 122.00                            | 172.00                        | na                                 | na                               | 324.00   | Milder et al., 2005        |
| Rye bread                       | 15.00                                     | 12.00                          | 111.00                            | 163.00                        | na                                 | na                               | 301.00   | Milder et al., 2005        |
| Rye bread                       | 17.00                                     | 0.00                           | 73.00                             | 33.00                         | na                                 | na                               | 123.00   | Milder et al., 2005        |
| Sesame seed                     | 7.30                                      | 123.10                         | 1052.40                           | 6814.50                       | na                                 | na                               | 7996.80  | Thompson et al., 2006      |
| Sesame seed                     | 66.00                                     | 481.00                         | 9470.00                           | 29331.00                      | na                                 | na                               | 39348.00 | Milder et al., 2005        |
| Sesame seeds                    | 240.00                                    | 1137.00                        | 13060.00                          | 47136.00                      | 205.00                             | 4153.00                          | 65931.00 | Smeds et al., 2007         |
| Spelt wheat                     | 155.00                                    | 8.60                           | 583.00                            | 494.00                        | 1126.00                            | 291.00                           | 2657.60  | Smeds et al., 2007         |
| Tea biscuits                    | 40.42                                     | 0.00                           | 12.26                             | 6.45                          | 70.38                              | 2.02                             | 131.53   | Moreno-Franco et al., 2011 |
| Triticale                       | 165.00                                    | 34.00                          | 402.00                            | 518.00                        | 899.00                             | 165.00                           | 2183.00  | Smeds et al., 2007         |
| Wheat                           | 868.00                                    | 410.00                         | 672.00                            | 138.00                        | 882.00                             | 232.00                           | 3202.00  | Smeds et al., 2007         |
| White bread                     | 7.44                                      | 0.00                           | 14.75                             | 9.02                          | 108.6                              | 2.87                             | 142.68   | Moreno-Franco et al., 2011 |
| White bread                     | 0.00                                      | 0.00                           | 11.00                             | 7.00                          | na                                 | na                               | 18.00    | Milder et al., 2005        |
| Whole bread                     | 19.44                                     | 0.00                           | 32.48                             | 23.37                         | 195.59                             | 6.28                             | 277.16   | Moreno-Franco et al., 2011 |
| Whole bread                     | 15.00                                     | 0.00                           | 73.00                             | 33.00                         | na                                 | na                               | 121.00   | Milder et al., 2005        |
| Whole weat meal                 | 31.00                                     | 0.00                           | 140.00                            | 38.00                         | na                                 | na                               | 209.00   | Milder et al., 2005        |
| <b>Condiments</b>               |                                           |                                |                                   |                               |                                    |                                  |          |                            |
| Amaranth                        | 98.00                                     | 33.00                          | 45.00                             | 53.00                         | 47.00                              | 114.00                           | 390.00   | Smeds et al., 2007         |
| Basilic                         | 546.00                                    | 1.90                           | na                                | na                            | na                                 | na                               | 546.00   | Valsta et al., 2003        |
| Capres                          | 44.50                                     | 15.10                          | na                                | na                            | na                                 | na                               | 59.60    | Valsta et al., 2003        |
| Garlic                          | 55.00                                     | na                             | 84.00                             | 45.00                         | na                                 | na                               | 184.00   | Penalvo et al., 2008       |
| Garlic                          | 93.00                                     | 4.00                           | na                                | na                            | na                                 | na                               | 97.00    | Kuhnle et al., 2009        |
| Garlic                          | 50.00                                     | 0.00                           | 286.00                            | 200.00                        | na                                 | na                               | 536.00   | Milder et al., 2005        |
| Garlic                          | 27.00                                     | 37.00                          | na                                | na                            | na                                 | na                               | 64.00    | Horn-Ross et al., 2000     |
| Ginger                          | na                                        | 16.00                          | na                                | 15.00                         | na                                 | na                               | 31.00    | Penalvo et al., 2008       |
| Ginger                          | 21.30                                     | 0.00                           | na                                | na                            | na                                 | na                               | 21.30    | Valsta et al., 2003        |
| Green pepper                    | 5.00                                      | na                             | 73.00                             | 6.00                          | na                                 | na                               | 84.00    | Penalvo et al., 2008       |
| Green pepper                    | 7.00                                      | 0.00                           | 106.00                            | 1.00                          | na                                 | na                               | 114.00   | Milder et al., 2005        |
| Origano (dry)                   | 44.40                                     | 1.00                           | na                                | na                            | na                                 | na                               | 45.40    | Valsta et al., 2003        |
| Paprika                         | 8.00                                      | 79.00                          | 2.00                              | na                            | na                                 | na                               | 89.00    | Penalvo et al., 2008       |
| Red pepper                      | 9.00                                      | na                             | 73.00                             | 1.00                          | na                                 | na                               | 83.00    | Penalvo et al., 2008       |
| Red pepper                      | 7.00                                      | 0.00                           | 106.00                            | 1.00                          | na                                 | na                               | 114.00   | Milder et al., 2005        |

| Fruits & Vegetables   | Secoisolariciresinol<br>(CAS 148244-82-0) | Matairesinol<br>(CAS 580-72-3) | Lariciresinol<br>(CAS 27003-73-2) | Pinoresinol<br>(CAS 487-36-5) | Syringaresinol<br>(CAS 21453-69-0) | Medioresinol<br>(CAS 40957-99-1) | Total   | References                 |
|-----------------------|-------------------------------------------|--------------------------------|-----------------------------------|-------------------------------|------------------------------------|----------------------------------|---------|----------------------------|
| µg/100g fresh weight  |                                           |                                |                                   |                               |                                    |                                  |         |                            |
| <b>Beverages</b>      |                                           |                                |                                   |                               |                                    |                                  |         |                            |
| Beer (mix)            | 0.5                                       | 0.0                            | 7.6                               | 17.4                          | na                                 | na                               | 25.5    | Tetens et al., 2013        |
| Coffee capsules       | 17.00                                     | nd                             | 5.30                              |                               | na                                 | na                               | 22.30   | Angeloni et al., 2020      |
| Coffee instant        | 862.00                                    | 58.00                          | na                                | na                            | na                                 | na                               | 920.00  | Kuhnle et al., 2008        |
| Coffee instant decaf. | 610.00                                    | 32.00                          | na                                | na                            | na                                 | na                               | 642.00  | Kuhnle et al., 2008        |
| Coffee (mix)          | 12.7                                      | 0.35                           | 11.1                              | 0.95                          | na                                 | na                               | 25.00   | Tetens et al., 2013        |
| Coffee powder         | 13.35                                     | nd                             | 4.25                              | na                            | na                                 | na                               | 17.60   | Angeloni et al., 2020      |
| Coffee grain          | 14.34                                     | nd                             | 5.31                              | na                            | na                                 | na                               | 19.65   | Angeloni et al., 2020      |
| Chamomile             | 440.67                                    | 0.00                           | 0.00                              | 2798.51                       | 2444.09                            | 276.00                           | 5959.27 | Moreno-Franco et al., 2011 |
| Dark chocolate        | 0.00                                      | 0.00                           | 20.00                             | 23.00                         | na                                 | na                               | 43.00   | Tetens et al., 2013        |
| Cocoa powder          | 8.00                                      | 0.00                           | 26.00                             | 26.00                         | na                                 | na                               | 60.00   | Tetens et al., 2013        |
| Tea (mix black/green) | 9.00                                      | 1.6                            | 24.8                              | 23.2                          | na                                 | na                               | 58.4    | Tetens et al., 2013        |
| Wine                  | 25.60                                     | 3.25                           | 5.50                              |                               | 3.60                               | 61.54                            | 99.49   | Nurmi et al.; 2003         |
| Red Wine              | 51.80                                     | 0.10                           | 13.00                             | 0.80                          | na                                 | na                               | 65.70   | Thompson et al., 2006      |
| Wine (mix)            | 33.3                                      | 5.3                            | 10.4                              | 6.8                           | na                                 | na                               | 55.7    | Tetens et al., 2013        |

## References.

- Angeloni et al. Quantification of lignans in 30 ground coffee samples and evaluation of their extraction yield in espresso coffee by HPLC-MS/MS triple quadrupole. *Int J Food Sci Nutr* **2020**, 71(2), 193–200 doi: 10.1080/09637486.2019.1624693
- Horn-Ross et al. Sources of phytoestrogen exposure among non-Asian women in California, USA. *Cancer Causes Control* **2000**, 11(4), 299-302. doi: 10.1023/a:1008968003575.
- Kuhnle et al. Phytoestrogen content of beverages, nuts, seeds, and oils. *J Agric Food Chem*. **2008**, 56(16), 7311-7315. doi: 10.1021/jf801534g.
- Kuhnle et al. Phytoestrogen content of cereals and cereal-based foods consumed in the UK. *Nutr Cancer*. **2009**, 61(3), 302-309. doi: 10.1080/01635580802567141.
- Kuhnle et al. Phytoestrogen content of fruits and vegetables commonly consumed in the UK based on LC–MS and <sup>13</sup>C-labelled standards. *Food Chem* **2009**, 116, 542-554. doi:10.1016/j.foodchem.2009.03.002
- Milder et al. Intake of the Plant Lignans Secoisolariciresinol, Matairesinol, Lariciresinol, and Pinoresinol in Dutch Men and Women. *J Nutr* **2005**, 135(5), 1202-1207. doi: 10.1093/jn/135.5.1202.
- Moreno-Franco et al. Dietary Alkylresorcinols and Lignans in the Spanish Diet: Development of the Alignia Database. *J Agric Food Chem* **2011**, 59(18), 9827-9834. doi: 10.1021/jf2015446.
- Nurmi et al. Lignans in selected wines. *Food Chem* **2003**, 83, 303-9. doi:10.1016/S0308-8146(03)00222-X
- Penalvo et al. Quantification of Lignans in Food Using Isotope Dilution Gas Chromatography/Mass Spectrometry. *J Agric Food Chem* **2008**, 53, 9342-9347 doi: 10.1021/jf051488w
- Smeds et al. Quantification of a broad spectrum of lignans in cereals, oilseeds, and nuts. *J Agric Food Chem* **2007**, 55, 1337-46. doi: 10.1021/jf0629134
- Tetens et al. Dietary intake and main sources of plant lignans in five European countries. *Food Nutr Res* **2013**, 57, 19805 -doi: 10.3402/fnr.v57i0.19805
- Thompson et al. Phytoestrogen Content of Foods Consumed in Canada, Including Isoflavones, Lignans, and Coumestan. *Nutr Cancer* **2006**, 54(2), 184-201, doi: 10.1207/s15327914nc5402\_5
- Valsta et al. Phyto-oestrogen database of foods and average intake in Finland. *Br J Nutr* **2003**, 89(S1), S31-S38. doi: 10.1079/BJN2002794.

**Table S2.** Dietary scales used to calculate dietary scores for DAI, GEN and ENL.

**Table S2A,** Scales for DAI and GEN associated to Urine determination;

| Column /lines | B                                      | C                       | D                    | E                       | F                    | G             | H                | I       | J                   |
|---------------|----------------------------------------|-------------------------|----------------------|-------------------------|----------------------|---------------|------------------|---------|---------------------|
| 1             | <b>Dietary scores for DAI in urine</b> |                         |                      |                         |                      |               |                  |         |                     |
| 2             |                                        | Two days before morning | Two days before noon | Two days before evening | Previous day morning | Previous noon | Previous evening | morning | Score               |
| 3             | Soy juice                              | 0.3                     | 0.5                  | 1.0                     | 1.5                  | 2.0           | 3.0              | 0.0     | = $\Sigma(N3*N4)$   |
| 4             |                                        |                         | 0                    | 0                       | 0                    | 0             | 0                | 0       |                     |
| 5             | Tofu /                                 | 0.3                     | 0.5                  | 1.0                     | 1.5                  | 2.0           | 3.0              | 0.0     | = $\Sigma(N5*N6)$   |
| 6             | soy-based cheese                       |                         | 0                    | 0                       | 0                    | 0             | 0                | 0       |                     |
| 7             | Soy-food                               | 0.3                     | 0.5                  | 1.0                     | 1.5                  | 2.0           | 3.0              | 0.0     | = $\Sigma(N7*N8)$   |
| 8             |                                        |                         | 0                    | 0                       | 0                    | 0             | 0                | 0       |                     |
| 9             | Soy-based yogurt                       | 0.0                     | 0.1                  | 0.3                     | 0.5                  | 1.0           | 1.5              | 0.0     | = $\Sigma(N9*N10)$  |
| 10            |                                        |                         | 0                    | 0                       | 0                    | 0             | 0                | 0       |                     |
| 11            | Transformed ++                         | 0.0                     | 0.1                  | 0.2                     | 0.4                  | 0.8           | 1.5              | 0.0     | = $\Sigma(N11*N12)$ |
| 12            |                                        |                         | 0                    | 0                       | 0                    | 0             | 0                | 0       |                     |
| 13            | Transformed +                          | 0.0                     | 0.0                  | 0.1                     | 0.2                  | 0.5           | 1.0              | 0.0     | = $\Sigma(N13*N14)$ |
| 14            |                                        |                         | 0                    | 0                       | 0                    | 0             | 0                | 0       |                     |
| 15            | Transformed                            | 0.0                     | 0.0                  | 0.0                     | 0.1                  | 0.3           | 0.5              | 0.0     | = $\Sigma(N15*N16)$ |
| 16            |                                        |                         | 1                    | 0                       | 0                    | 1             | 2                | 0       |                     |
| 17            | Transformed -                          | 0.0                     | 0.0                  | 0.0                     | 0.0                  | 0.0           | 0.0              | 0.0     | = $\Sigma(N17*N18)$ |
| 18            |                                        |                         | 0                    | 0                       | 0                    | 0             | 0                | 0       |                     |
| 19            | Canteen                                |                         | 0,1                  | 0,1                     |                      | 0,2           | 0,2              |         | = $\Sigma(N19*N20)$ |
| 20            |                                        |                         | 0                    | 0                       |                      | 0             | 0                |         |                     |
| 22            | <b>Urine DAI Score</b>                 |                         |                      |                         |                      |               |                  |         | = $\Sigma(J3;J20)$  |
| 23            | <b>Dietary scores for GEN in urine</b> |                         |                      |                         |                      |               |                  |         |                     |
| 24            |                                        | Two days before morning | Two days before noon | Two days before evening | Previous day morning | Previous noon | Previous evening | morning | Score               |
| 25            | Soy juice                              | 0.3                     | 0.5                  | 1.0                     | 1.5                  | 2.0           | 3.0              | 0.0     | = $\Sigma(N25*N26)$ |
| 26            |                                        |                         | 0                    | 0                       | 0                    | 0             | 0                | 0       |                     |
| 27            | Tofu /                                 | 0.3                     | 0.5                  | 1.0                     | 1.5                  | 2.0           | 3.0              | 0.0     | = $\Sigma(N27*N28)$ |
| 28            | soy-based cheese                       |                         | 0                    | 0                       | 0                    | 0             | 0                | 0       |                     |
| 29            | Soy-food                               | 0.3                     | 0.5                  | 1.0                     | 1.5                  | 2.0           | 3.0              | 0.0     | = $\Sigma(N29*N30)$ |
| 30            |                                        |                         | 0                    | 0                       | 0                    | 0             | 0                | 0       |                     |
| 31            | Soy-based yogurt                       | 0.0                     | 0.1                  | 0.3                     | 0.5                  | 1.0           | 1.5              | 0.0     | = $\Sigma(N31*N32)$ |
| 32            |                                        |                         | 0                    | 0                       | 0                    | 0             | 0                | 0       |                     |
| 33            | Transformed ++                         | 0.0                     | 0.1                  | 0.2                     | 0.4                  | 0.8           | 1.5              | 0.0     | = $\Sigma(N33*N34)$ |
| 34            |                                        |                         | 0                    | 0                       | 0                    | 0             | 0                | 0       |                     |
| 35            | Transformed +                          | 0.0                     | 0.0                  | 0.1                     | 0.2                  | 0.5           | 0.1              | 0.0     | = $\Sigma(N35*N36)$ |
| 36            |                                        |                         | 0                    | 0                       | 0                    | 0             | 0                | 0       |                     |
| 37            | Transformed                            | 0.0                     | 0.0                  | 0.0                     | 0.1                  | 0.3           | 0.5              | 0.0     | = $\Sigma(N37*N38)$ |
| 38            |                                        |                         | 0                    | 0                       | 0                    | 0             | 0                | 0       |                     |
| 39            | Transformed -                          | 0.0                     | 0.0                  | 0.0                     | 0.0                  | 0.0           | 0.0              | 0.0     | = $\Sigma(N39*N40)$ |
| 40            |                                        |                         | 0                    | 0                       | 0                    | 0             | 0                | 0       |                     |
| 41            | Canteen                                |                         | 0.1                  | 0.1                     |                      | 0.2           | 0.2              |         | = $\Sigma(N41*N42)$ |
| 42            |                                        |                         | 0                    | 0                       |                      | 0             | 0                |         |                     |
|               | <b>Urine GEN Score</b>                 |                         |                      |                         |                      |               |                  |         | = $\Sigma(J25;J41)$ |
|               | <b>Urine IFs Score</b>                 |                         |                      |                         |                      |               |                  |         | = $\Sigma(J22;J43)$ |

**Table S2.** Dietary scales used to calculate dietary scores for DAI, GEN and ENL.

**Table S2B,** Scales for DAI and GEN associated with plasma determination,

| Column /lines | B                                      | C                       | D                    | E                       | F                    | G             | H                | I       | J                    |
|---------------|----------------------------------------|-------------------------|----------------------|-------------------------|----------------------|---------------|------------------|---------|----------------------|
| 1             | <b>Dietary score for DAI in plasma</b> |                         |                      |                         |                      |               |                  |         |                      |
| 2             |                                        | Two days before morning | Two days before noon | Two days before evening | Previous day morning | Previous noon | Previous evening | morning | Score                |
| 3             | Soy juice                              | 0.5                     | 1                    | 2                       | 3                    | 4             | 8                | 8       | $=\Sigma(N3*N4)$     |
| 4             |                                        |                         | 0                    | 0                       | 0                    | 0             | 0                | 0       |                      |
| 5             | Tofu /                                 | 0.5                     | 1                    | 2                       | 3                    | 4             | 8                | 8       | $=\Sigma(N5*N6)$     |
| 6             | soy-based cheese                       |                         | 0                    | 0                       | 0                    | 0             | 0                | 0       |                      |
| 7             | Soy-food                               | 0.5                     | 1                    | 2                       | 3                    | 4             | 8                | 8       | $=\Sigma(N7*N8)$     |
| 8             |                                        |                         | 0                    | 0                       | 0                    | 0             | 0                | 0       |                      |
| 9             | Soy-based yogurt                       | 0                       | 0.5                  | 1                       | 1.5                  | 2             | 4                | 4       | $=\Sigma(N9*N10)$    |
| 10            |                                        |                         | 0                    | 0                       | 0                    | 0             | 0                | 0       |                      |
| 11            | Transformed ++                         | 0                       | 0.5                  | 1                       | 1.5                  | 2             | 4                | 4       | $=\Sigma(N11*N12)$   |
| 12            |                                        |                         | 0                    | 0                       | 0                    | 0             | 0                | 0       |                      |
| 13            | Transformed +                          | 0                       | 0                    | 0.5                     | 0.75                 | 1             | 2                | 2       | $=\Sigma(N13*N14)$   |
| 14            |                                        |                         | 0                    | 0                       | 0                    | 0             | 0                | 0       |                      |
| 15            | Transformed                            | 0                       | 0                    | 0.25                    | 0.4                  | 0.5           | 1                | 1       | $=\Sigma(N15*N16)$   |
| 16            |                                        |                         | 0                    | 0                       | 0                    | 0             | 0                | 0       |                      |
| 17            | Transformed -                          | 0                       | 0                    | 0                       | 0                    | 0             | 0                | 0       | $=\Sigma(N17*N18)$   |
| 19            |                                        |                         | 0                    | 0                       | 0                    | 0             | 0                | 0       |                      |
| 20            | Canteen                                |                         | 0.1                  | 0.1                     |                      | 0.2           | 0.2              |         | $=\Sigma(N19*N20)$   |
| 21            |                                        |                         | 0                    | 0                       | 0                    | 0             | 0                | 0       |                      |
| 22            | <b>Plasma DAI Score</b>                |                         |                      |                         |                      |               |                  |         | $=\Sigma(J3:J20)/2$  |
| 23            | <b>Dietary score for GEN in plasma</b> |                         |                      |                         |                      |               |                  |         |                      |
| 24            |                                        | Two days before morning | Two days before noon | Two days before evening | Previous day morning | Previous noon | Previous evening | morning | Score                |
| 25            | Soy juice                              | 1                       | 1.5                  | 2                       | 4                    | 6             | 8                | 8       | $=\Sigma(N25*N26)$   |
| 26            |                                        |                         | 0                    | 0                       | 0                    | 0             | 0                | 0       |                      |
| 27            | Tofu /                                 | 1                       | 1.5                  | 2                       | 4                    | 6             | 8                | 8       | $=\Sigma(N27*N28)$   |
| 25            | soy-based cheese                       |                         | 0                    | 0                       | 0                    | 0             | 0                | 0       |                      |
| 29            | Soy-food                               | 1                       | 1.5                  | 2                       | 4                    | 6             | 8                | 8       | $=\Sigma(N29*N30)$   |
| 30            |                                        |                         | 0                    | 0                       | 0                    | 0             | 0                | 0       |                      |
| 31            | Soy-based yogurt                       | 0                       | 0.5                  | 1                       | 2                    | 3             | 4                | 4       | $=\Sigma(N31*N32)$   |
| 32            |                                        |                         | 0                    | 0                       | 0                    | 0             | 0                | 0       |                      |
| 33            | Transformed ++                         | 0                       | 0                    | 0.5                     | 1                    | 1.5           | 2                | 2       | $=\Sigma(N33*N34)$   |
| 34            |                                        |                         | 0                    | 0                       | 0                    | 0             | 0                | 0       |                      |
| 35            | Transformed +                          | 0                       | 0                    | 0.25                    | 0.5                  | 0.75          | 1                | 1       | $=\Sigma(N35*N36)$   |
| 36            |                                        |                         | 0                    | 0                       | 0                    | 0             | 0                | 0       |                      |
| 37            | Transformed                            | 0                       | 0.2                  | 0.2                     |                      | 0.4           | 0.4              | 0       | $=\Sigma(N37*N38)$   |
| 38            |                                        |                         | 0                    | 0                       | 0                    | 0             | 0                | 0       |                      |
| 39            | Transformed -                          |                         | 0                    | 0                       |                      | 0             | 0                | 0       | $=\Sigma(N39*N40)$   |
| 40            |                                        |                         | 0                    | 0                       | 0                    | 0             | 0                | 0       |                      |
| 41            | Canteen                                |                         | 0.1                  | 0.1                     |                      | 0.2           | 0.2              |         | $=\Sigma(N41*N42)$   |
| 42            |                                        |                         | 0                    | 0                       | 0                    | 0             | 0                | 0       |                      |
| 43            | <b>Plasma GEN Score</b>                |                         |                      |                         |                      |               |                  |         | $=\Sigma(J25:J41)/2$ |
| 44            |                                        |                         |                      |                         |                      |               |                  |         |                      |
| 45            | <b>Plasma IFs Score</b>                |                         |                      |                         |                      |               |                  |         | $=\Sigma(J22;J43)/2$ |



**Table S2.** Dietary scales used to calculate dietary scores for DAI, GEN and ENL.**Table S2C,** Scales for ENL associated with urine determination.

| Column /lines | B                          | C                                     | D                    | E                       | F                    | G                 | H                    | I       | J                   |
|---------------|----------------------------|---------------------------------------|----------------------|-------------------------|----------------------|-------------------|----------------------|---------|---------------------|
| 1             |                            | <b>Dietary Score for ENL in urine</b> |                      |                         |                      |                   |                      |         |                     |
| 2             | Foodstuff                  | Two days before morning               | Two days before noon | Two days before evening | Previous day morning | Previous day noon | Previous day evening | morning | Score               |
| 3             | Cereals and grain products | 2                                     | 2                    | 3                       | 3                    | 2                 | 1                    | 0       | = $\Sigma(N3*N4)$   |
| 4             |                            | 0                                     | 0                    | 0                       | 0                    | 0                 | 0                    | 0       |                     |
| 5             | Cabbages                   | 2                                     | 2                    | 3                       | 3                    | 2                 | 1                    | 0       | = $\Sigma(N5*N6)$   |
| 6             | Squashes                   | 0                                     | 0                    | 0                       | 0                    | 0                 | 0                    | 0       |                     |
| 7             | Prunus / Apricots          | 2                                     | 2                    | 3                       | 3                    | 2                 | 1                    | 0       | = $\Sigma(N7*N8)$   |
| 8             | Citrus / Dates             | 0                                     | 0                    | 0                       | 0                    | 1                 | 0                    | 0       |                     |
| 9             | Berries                    | 2                                     | 2                    | 3                       | 3                    | 2                 | 1                    | 0       | = $\Sigma(N9*N10)$  |
| 10            |                            | 0                                     | 0                    | 0                       | 0                    | 0                 | 0                    | 0       |                     |
| 11            | Chamomile                  | 2                                     | 2                    | 3                       | 3                    | 2                 | 1                    | 0       | = $\Sigma(N11*N12)$ |
| 12            |                            | 0                                     | 0                    | 0                       | 0                    | 0                 | 0                    | 0       |                     |
| 13            | Nuts                       | 1                                     | 1                    | 2                       | 2                    | 1                 | 0.5                  | 0       | = $\Sigma(N13*N14)$ |
| 14            | Oil seeds                  | 0                                     | 0                    | 0                       | 0                    | 0                 | 0                    | 0       |                     |
| 15            | Beans / Lentils            | 1                                     | 1                    | 2                       | 2                    | 1                 | 0.5                  | 0       | = $\Sigma(N15*N16)$ |
| 16            | Soy                        | 0                                     | 0                    | 0                       | 0                    | 0                 | 0                    | 0       |                     |
| 17            | Fruits & vegetables        | 1                                     | 1                    | 2                       | 2                    | 1                 | 0.5                  | 0       | = $\Sigma(N17*N18)$ |
| 18            | Pasta                      | 0                                     | 1                    | 0                       | 0                    | 0                 | 0                    | 0       |                     |
| 19            | Coffee instant             | 1                                     | 1                    | 2                       | 2                    | 1                 | 0.5                  | 0       | = $\Sigma(N19*N20)$ |
| 20            | Chocolate                  | 0                                     | 1                    | 0                       | 0                    | 0                 | 0                    | 0       |                     |
| 21            | Carob /                    | 1                                     | 1                    | 2                       | 2                    | 1                 | 0.5                  | 0       | = $\Sigma(N21*N22)$ |
| 22            | Transformed meals          | 0                                     | 0                    | 0                       | 0                    | 0                 | 0                    | 0       |                     |
| 23            | Wine / Beer                | 0.5                                   | 1                    | 1                       | 1                    | 0.5               | 0.2                  | 0       | = $\Sigma(N23*N24)$ |
| 24            |                            | 0                                     | 0                    | 0                       | 0                    | 0                 | 0                    | 0       |                     |
| 25            | Cantine                    | 0.2                                   | 0.5                  | 1                       | 1                    | 0.5               | 0.2                  | 0       | = $\Sigma(N25*N26)$ |
| 26            |                            | 0                                     | 0                    | 0                       |                      | 0                 | 0                    |         |                     |
| 27            | Urine score Enterolactone  |                                       |                      |                         |                      |                   |                      |         | = $\Sigma(J3:J25)$  |

**Table S2D,** Scales for ENL associated with plasma determination.

| Column /lines | B                          | C                                      | D                    | E                       | F                    | G                 | H                    | I       | J                   |
|---------------|----------------------------|----------------------------------------|----------------------|-------------------------|----------------------|-------------------|----------------------|---------|---------------------|
| 1             |                            | <b>Dietary Score for ENL in plasma</b> |                      |                         |                      |                   |                      |         |                     |
| 2             | Foodstuff                  | Two days before morning                | Two days before noon | Two days before evening | Previous day morning | Previous day noon | Previous day evening | morning | Score               |
| 3             | Cereals and grain products | 0.2                                    | 0.2                  | 1                       | 3                    | 2                 | 1                    | 0       | = $\Sigma(N3*N4)$   |
| 4             |                            |                                        | 0                    | 0                       | 0                    | 0                 | 0                    | 0       |                     |
| 5             | Cabbages                   | 0.2                                    | 0.5                  | 1                       | 3                    | 2                 | 1                    | 0       | = $\Sigma(N5*N6)$   |
| 6             | Squashes                   |                                        | 0                    | 0                       | 0                    | 0                 | 0                    | 0       |                     |
| 7             | Prunus / Apricots          | 0.2                                    | 0.5                  | 1                       | 3                    | 2                 | 1                    | 0       | = $\Sigma(N7*N8)$   |
| 8             | Citrus / Dates             |                                        | 0                    | 0                       | 0                    | 1                 | 0                    | 0       |                     |
| 9             | Berries                    | 0.2                                    | 0.5                  | 1                       | 3                    | 2                 | 1                    | 0       | = $\Sigma(N9*N10)$  |
| 10            |                            |                                        | 0                    | 0                       | 0                    | 0                 | 0                    | 0       |                     |
| 11            | Chamomile                  | 0.2                                    | 0.5                  | 1                       | 3                    | 2                 | 1                    | 0       | = $\Sigma(N11*N12)$ |
| 12            |                            |                                        | 0                    | 0                       | 0                    | 0                 | 0                    | 0       |                     |
| 13            | Nuts                       | 0                                      | 0.2                  | 0.5                     | 2                    | 1                 | 0.5                  | 0       | = $\Sigma(N13*N14)$ |
| 14            | Oil seeds                  |                                        | 0                    | 0                       | 0                    | 0                 | 0                    | 0       |                     |
| 15            | Beans / Lentils            | 0                                      | 0.2                  | 0.5                     | 2                    | 1                 | 0.5                  | 0       | = $\Sigma(N15*N16)$ |
| 16            | Soy                        |                                        | 0                    | 0                       | 0                    | 0                 | 0                    | 0       |                     |
| 17            | Fruits & vegetables        | 0                                      | 0.2                  | 0.5                     | 2                    | 1                 | 0.5                  | 0       | = $\Sigma(N17*N18)$ |
| 18            | Pasta                      |                                        | 1                    | 0                       | 0                    | 0                 | 0                    | 0       |                     |
| 19            | Coffee instant             | 0                                      | 0.2                  | 0.5                     | 2                    | 1                 | 0.5                  | 0       | = $\Sigma(N19*N20)$ |
| 20            | Chocolate                  |                                        | 1                    | 0                       | 0                    | 0                 | 0                    | 0       |                     |
| 21            | Carob /                    | 0                                      | 0.2                  | 0.5                     | 2                    | 1                 | 0.5                  | 0       | = $\Sigma(N21*N22)$ |
| 22            | Transformed meals          |                                        | 0                    | 0                       | 0                    | 0                 | 0                    | 0       |                     |
| 23            | Wine / Beer                | 0                                      | 0                    | 0.2                     | 1                    | 0.5               | 0.2                  | 0       | = $\Sigma(N23*N24)$ |
| 24            |                            |                                        | 0                    | 0                       | 0                    | 0                 | 0                    | 0       |                     |
| 25            | Cantine                    | 0                                      | 0                    | 0.2                     | 1                    | 0.5               | 0.2                  | 0       | = $\Sigma(N25*N26)$ |
| 26            |                            |                                        | 0                    | 0                       |                      | 0                 | 0                    |         |                     |
| 27            | Plasma score Enterolactone |                                        |                      |                         |                      |                   |                      |         | = $\Sigma(J3:J25)$  |

**Figure S1.** Consort diagram of the recruitment of volunteers at the time of the study samples collected and inquiry completed.

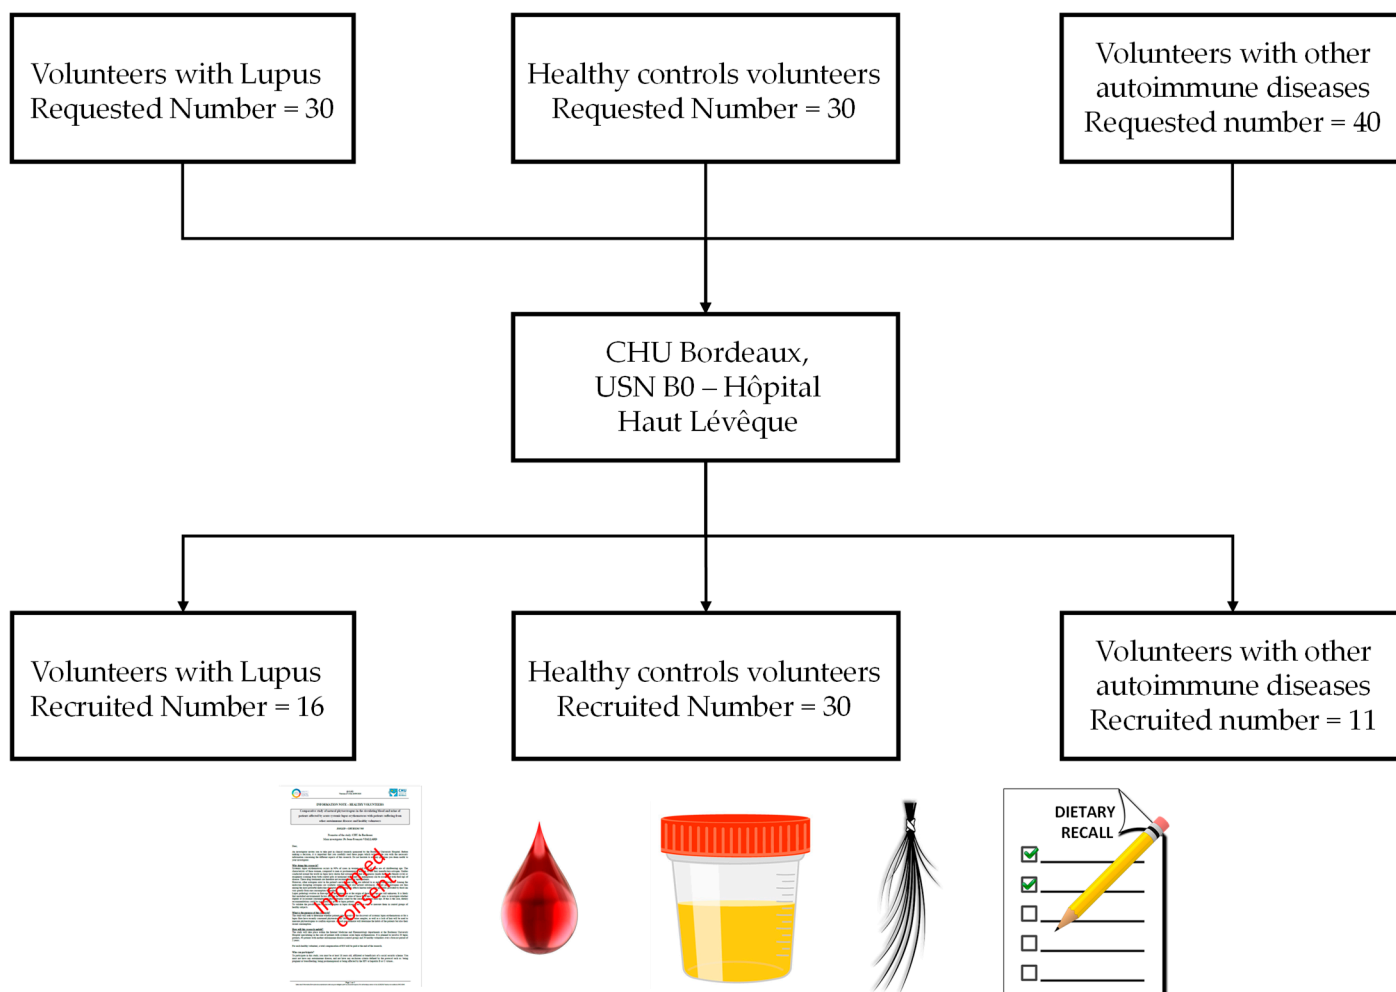

**Figure S2.** Correlation between urinary DAI and GEN and their respective dietary scores. **Fig S2A:** correlation between urinary DAI concentrations and the corresponding dietary scores. **Fig S2B:** correlation between urinary GEN concentrations and the corresponding dietary scores.

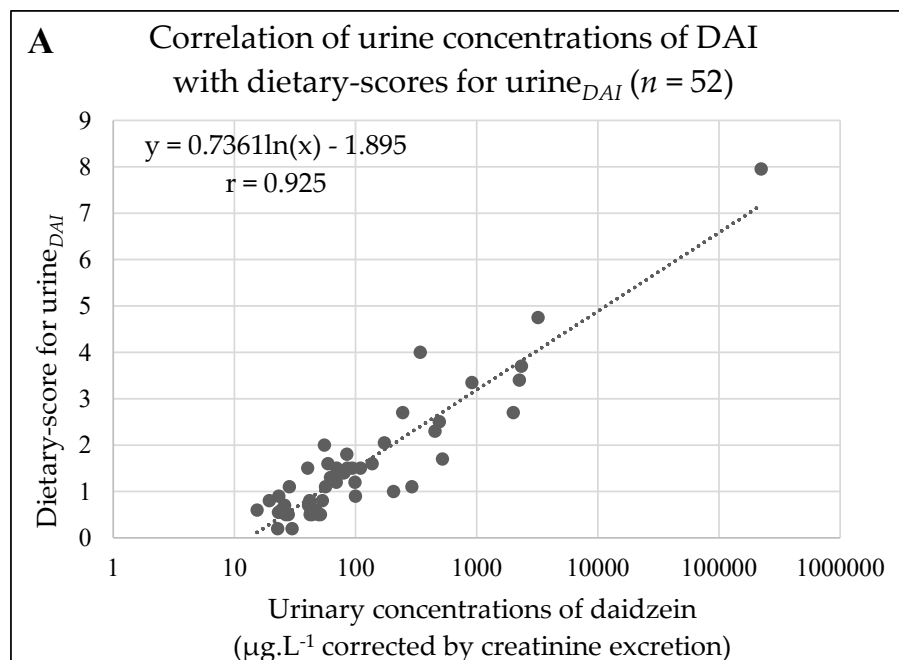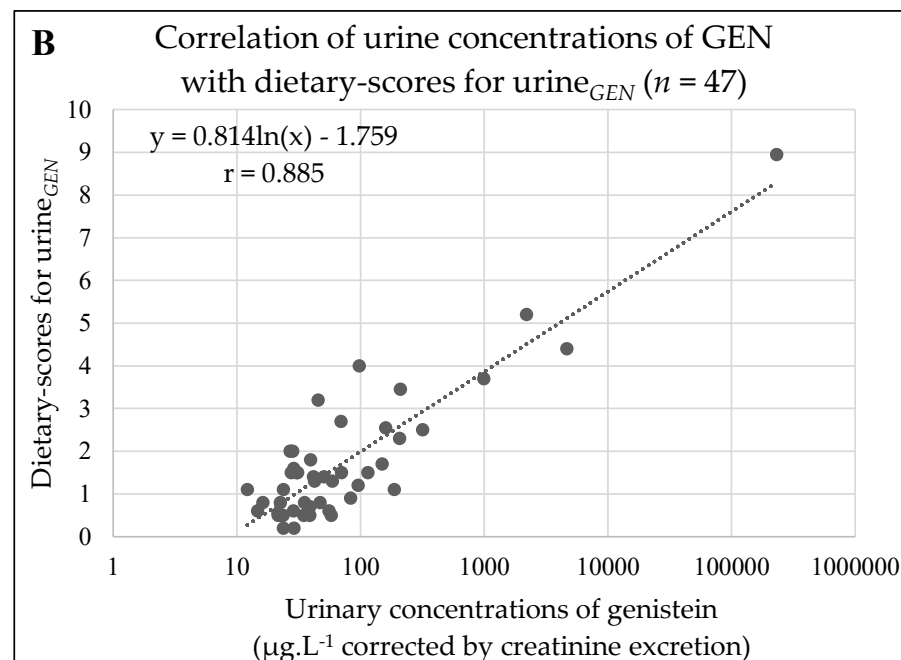

**Figure S3.** Correlation between plasma DAI and GEN and their respective dietary scores. **Fig S3A:** correlation between plasma DAI concentrations and the corresponding dietary scores. **Fig S3B:** correlation between plasma GEN concentrations and the corresponding dietary scores.

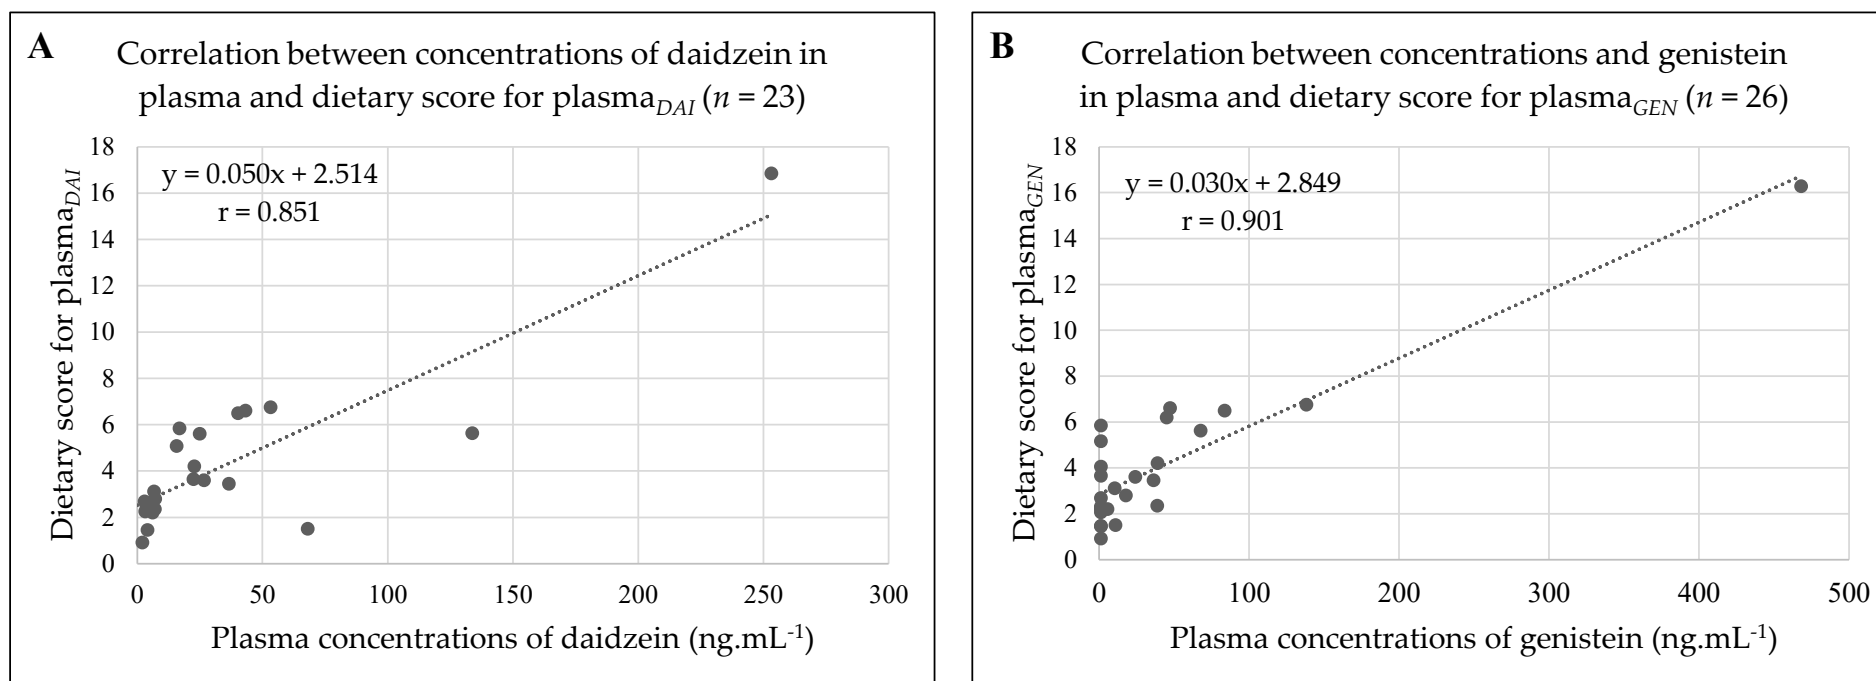

**Figure S4.** Correlation between urine and plasma IFs concentrations.

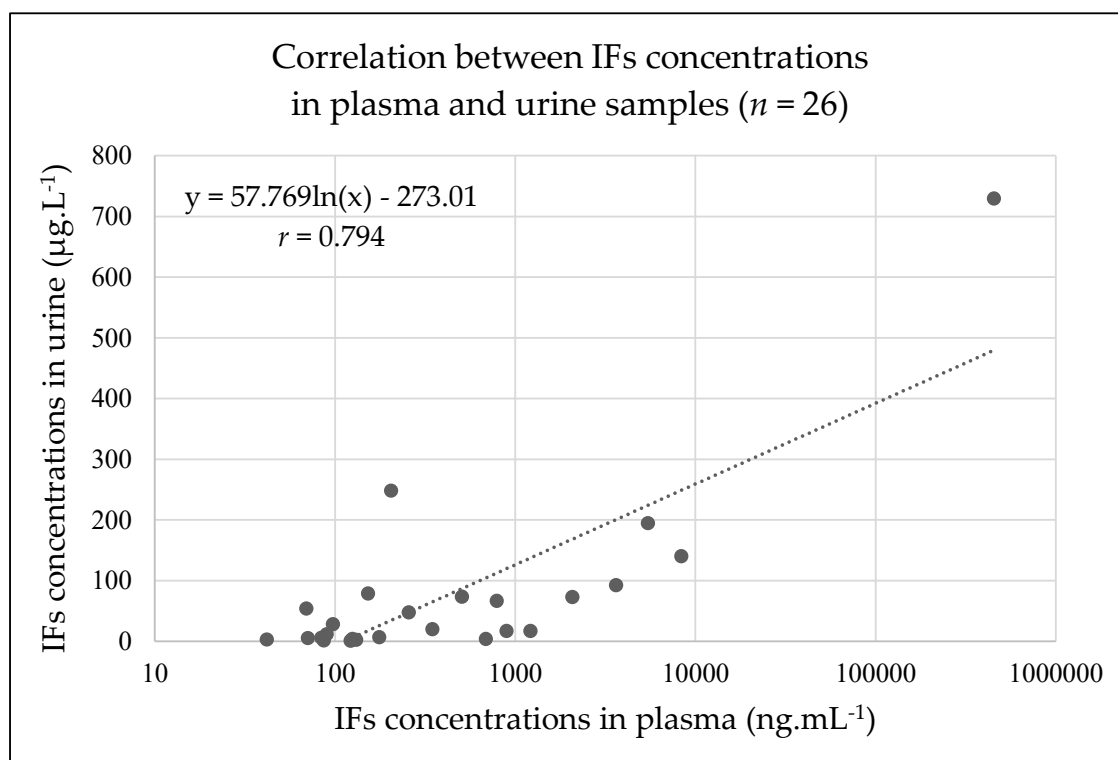

**Figure S5.** Correlation between ENL and IFs data. **Fig S5A.** correlation based on PHYTOs urine concentrations; **Fig S5B.** correlation based on PHYTOs dietary scores.

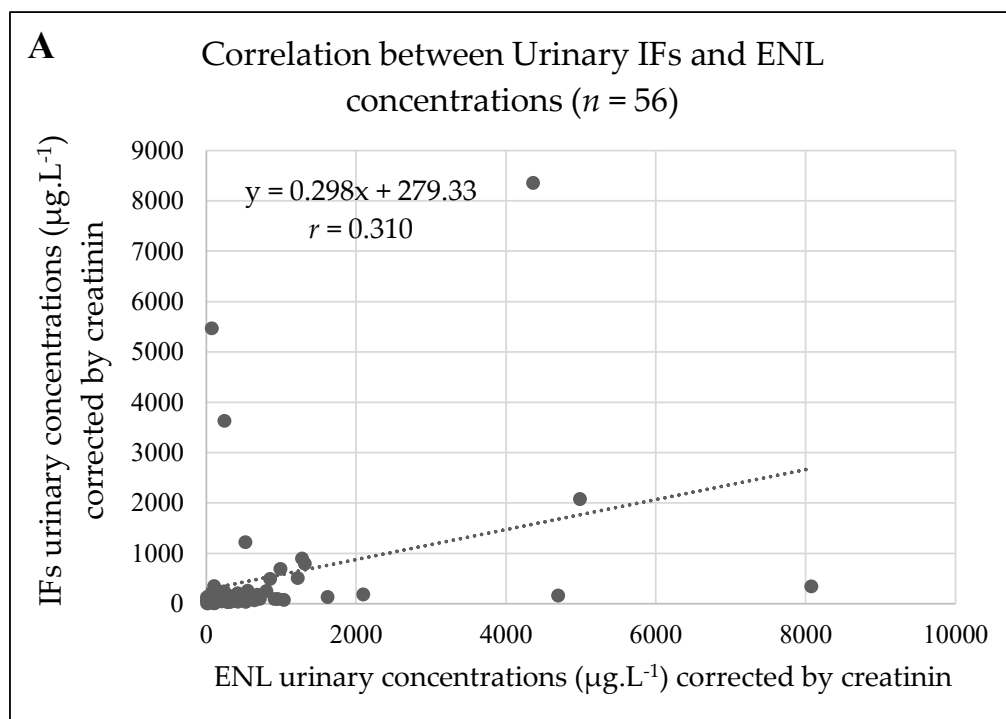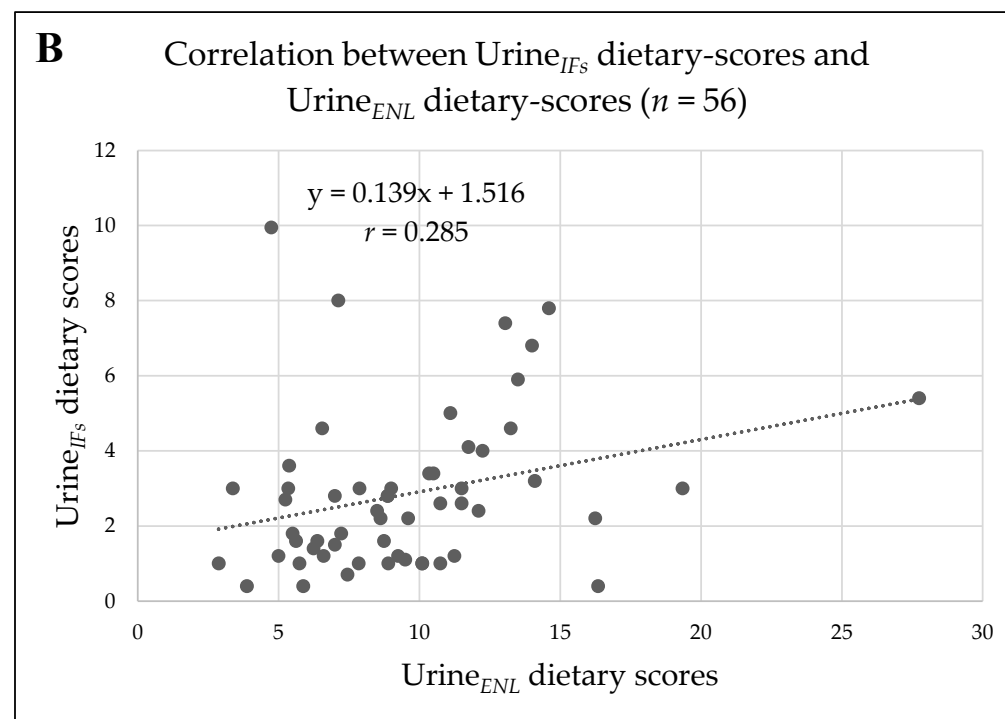

## Diet inquiry: Recall of the previous day (this morning)

### Subject identification

|                   |                      |                      |                      |
|-------------------|----------------------|----------------------|----------------------|
| Study acronyme    | <input type="text"/> | Promotor name        | <input type="text"/> |
| Subject code      | <input type="text"/> | Date of the inquiry  | <input type="text"/> |
| Investigator name | <input type="text"/> | Name of the inquirer | <input type="text"/> |

### Breakfast consumption

Meal time

|               |                                  |                                      |
|---------------|----------------------------------|--------------------------------------|
| Meal location | At home <input type="checkbox"/> | Outside Precise <input type="text"/> |
|---------------|----------------------------------|--------------------------------------|

|              | Nbre                 | Home made                | Trade mark               | Total consumption                                       |
|--------------|----------------------|--------------------------|--------------------------|---------------------------------------------------------|
| Hot drink(s) | <input type="text"/> | <input type="checkbox"/> | <input type="checkbox"/> | <input type="text"/> 1/2 <input type="checkbox"/> Spoon |
|              | <input type="text"/> | <input type="checkbox"/> | <input type="checkbox"/> | <input type="text"/> 1 <input type="checkbox"/> Glass   |
|              | <input type="text"/> | <input type="checkbox"/> | <input type="checkbox"/> | <input type="text"/> 2 <input type="checkbox"/> Bowl    |
|              | <input type="text"/> | <input type="checkbox"/> | <input type="checkbox"/> | <input type="text"/> 3 <input type="checkbox"/> Mug     |
|              | <input type="text"/> | <input type="checkbox"/> | <input type="checkbox"/> | <input type="text"/> 4 <input type="checkbox"/> Portion |

|               |                      |                          |                          |                                                         |
|---------------|----------------------|--------------------------|--------------------------|---------------------------------------------------------|
| Cold drink(s) | <input type="text"/> | <input type="checkbox"/> | <input type="checkbox"/> | <input type="text"/> 1/2 <input type="checkbox"/> Spoon |
|               | <input type="text"/> | <input type="checkbox"/> | <input type="checkbox"/> | <input type="text"/> 1 <input type="checkbox"/> Glass   |
|               | <input type="text"/> | <input type="checkbox"/> | <input type="checkbox"/> | <input type="text"/> 2 <input type="checkbox"/> Bowl    |
|               | <input type="text"/> | <input type="checkbox"/> | <input type="checkbox"/> | <input type="text"/> 3 <input type="checkbox"/> Mug     |
|               | <input type="text"/> | <input type="checkbox"/> | <input type="checkbox"/> | <input type="text"/> 4 <input type="checkbox"/> Portion |

|         |                      |                          |                          |                                                         |
|---------|----------------------|--------------------------|--------------------------|---------------------------------------------------------|
| Cereals | <input type="text"/> | <input type="checkbox"/> | <input type="checkbox"/> | <input type="text"/> 1/2 <input type="checkbox"/> Spoon |
|         | <input type="text"/> | <input type="checkbox"/> | <input type="checkbox"/> | <input type="text"/> 1 <input type="checkbox"/> Plate   |
|         | <input type="text"/> | <input type="checkbox"/> | <input type="checkbox"/> | <input type="text"/> 2 <input type="checkbox"/> Bowl    |
|         | <input type="text"/> | <input type="checkbox"/> | <input type="checkbox"/> | <input type="text"/> 3 <input type="checkbox"/> Mug     |
|         | <input type="text"/> | <input type="checkbox"/> | <input type="checkbox"/> | <input type="text"/> 4 <input type="checkbox"/> Portion |

|                                                            |                      |                          |                          |                                                         |
|------------------------------------------------------------|----------------------|--------------------------|--------------------------|---------------------------------------------------------|
| Bread products<br>(sandwich bread,<br>brioche, pastry ...) | <input type="text"/> | <input type="checkbox"/> | <input type="checkbox"/> | <input type="text"/> 1/2 <input type="checkbox"/> Spoon |
|                                                            | <input type="text"/> | <input type="checkbox"/> | <input type="checkbox"/> | <input type="text"/> 1 <input type="checkbox"/> Slice   |
|                                                            | <input type="text"/> | <input type="checkbox"/> | <input type="checkbox"/> | <input type="text"/> 2 <input type="checkbox"/> Plate   |
|                                                            | <input type="text"/> | <input type="checkbox"/> | <input type="checkbox"/> | <input type="text"/> 3 <input type="checkbox"/> Portion |
|                                                            | <input type="text"/> | <input type="checkbox"/> | <input type="checkbox"/> | <input type="text"/> 4 <input type="checkbox"/>         |

|              |                      |                          |                          |                                                         |
|--------------|----------------------|--------------------------|--------------------------|---------------------------------------------------------|
| Delicatessen | <input type="text"/> | <input type="checkbox"/> | <input type="checkbox"/> | <input type="text"/> 1/2 <input type="checkbox"/> Spoon |
|              | <input type="text"/> | <input type="checkbox"/> | <input type="checkbox"/> | <input type="text"/> 1 <input type="checkbox"/> Slice   |
|              | <input type="text"/> | <input type="checkbox"/> | <input type="checkbox"/> | <input type="text"/> 2 <input type="checkbox"/> Toast   |
|              | <input type="text"/> | <input type="checkbox"/> | <input type="checkbox"/> | <input type="text"/> 3 <input type="checkbox"/> Plate   |
|              | <input type="text"/> | <input type="checkbox"/> | <input type="checkbox"/> | <input type="text"/> 4 <input type="checkbox"/> Portion |

Meal time ☐

|                           |                      |                          |                          |                                                         |
|---------------------------|----------------------|--------------------------|--------------------------|---------------------------------------------------------|
| Eggs and derived products | <input type="text"/> | <input type="checkbox"/> | <input type="checkbox"/> | <input type="text"/> 1/2 <input type="checkbox"/> Spoon |
|                           | <input type="text"/> | <input type="checkbox"/> | <input type="checkbox"/> | <input type="text"/> 1 <input type="checkbox"/> Glass   |
|                           | <input type="text"/> | <input type="checkbox"/> | <input type="checkbox"/> | <input type="text"/> 2 <input type="checkbox"/> Bowl    |
|                           | <input type="text"/> | <input type="checkbox"/> | <input type="checkbox"/> | <input type="text"/> 3 <input type="checkbox"/> Plate   |
|                           | <input type="text"/> | <input type="checkbox"/> | <input type="checkbox"/> | <input type="text"/> 4 <input type="checkbox"/> Portion |

## Diet inquiry: Recall of the previous day (this morning)

### Subject identification

|                   |                                          |                      |                                          |
|-------------------|------------------------------------------|----------------------|------------------------------------------|
| Study acronym     | <input style="width: 90%;" type="text"/> | Promotor name        | <input style="width: 90%;" type="text"/> |
| Subject code      | <input style="width: 90%;" type="text"/> | Date of the inquiry  | <input style="width: 90%;" type="text"/> |
| Investigator name | <input style="width: 90%;" type="text"/> | Name of the inquirer | <input style="width: 90%;" type="text"/> |

### Breakfast consumption (following)

|                                                   |                                          |                          |                          |                                          |                          |     |                          |         |
|---------------------------------------------------|------------------------------------------|--------------------------|--------------------------|------------------------------------------|--------------------------|-----|--------------------------|---------|
| Dairy products<br>(animal or<br>plant-based milk) | <input style="width: 90%;" type="text"/> | <input type="checkbox"/> | <input type="checkbox"/> | <input style="width: 90%;" type="text"/> | <input type="checkbox"/> | 1/2 | <input type="checkbox"/> | Spoon   |
|                                                   | <input style="width: 90%;" type="text"/> | <input type="checkbox"/> | <input type="checkbox"/> | <input style="width: 90%;" type="text"/> | <input type="checkbox"/> | 1   | <input type="checkbox"/> | Glass   |
|                                                   | <input style="width: 90%;" type="text"/> | <input type="checkbox"/> | <input type="checkbox"/> | <input style="width: 90%;" type="text"/> | <input type="checkbox"/> | 2   | <input type="checkbox"/> | Bowl    |
|                                                   | <input style="width: 90%;" type="text"/> | <input type="checkbox"/> | <input type="checkbox"/> | <input style="width: 90%;" type="text"/> | <input type="checkbox"/> | 3   | <input type="checkbox"/> | Plate   |
|                                                   | <input style="width: 90%;" type="text"/> | <input type="checkbox"/> | <input type="checkbox"/> | <input style="width: 90%;" type="text"/> | <input type="checkbox"/> | 4   | <input type="checkbox"/> | Portion |

|                |                                          |                          |                          |                                          |                          |     |                          |         |
|----------------|------------------------------------------|--------------------------|--------------------------|------------------------------------------|--------------------------|-----|--------------------------|---------|
| Fruit products | <input style="width: 90%;" type="text"/> | <input type="checkbox"/> | <input type="checkbox"/> | <input style="width: 90%;" type="text"/> | <input type="checkbox"/> | 1/2 | <input type="checkbox"/> | Spoon   |
|                | <input style="width: 90%;" type="text"/> | <input type="checkbox"/> | <input type="checkbox"/> | <input style="width: 90%;" type="text"/> | <input type="checkbox"/> | 1   | <input type="checkbox"/> | Glass   |
|                | <input style="width: 90%;" type="text"/> | <input type="checkbox"/> | <input type="checkbox"/> | <input style="width: 90%;" type="text"/> | <input type="checkbox"/> | 2   | <input type="checkbox"/> | Bowl    |
|                | <input style="width: 90%;" type="text"/> | <input type="checkbox"/> | <input type="checkbox"/> | <input style="width: 90%;" type="text"/> | <input type="checkbox"/> | 3   | <input type="checkbox"/> | Plate   |
|                | <input style="width: 90%;" type="text"/> | <input type="checkbox"/> | <input type="checkbox"/> | <input style="width: 90%;" type="text"/> | <input type="checkbox"/> | 4   | <input type="checkbox"/> | Portion |

|                                 |                                          |                          |                          |                                          |                          |     |                          |         |
|---------------------------------|------------------------------------------|--------------------------|--------------------------|------------------------------------------|--------------------------|-----|--------------------------|---------|
| Vegetables<br>(Beans, potatoes) | <input style="width: 90%;" type="text"/> | <input type="checkbox"/> | <input type="checkbox"/> | <input style="width: 90%;" type="text"/> | <input type="checkbox"/> | 1/2 | <input type="checkbox"/> | Spoon   |
|                                 | <input style="width: 90%;" type="text"/> | <input type="checkbox"/> | <input type="checkbox"/> | <input style="width: 90%;" type="text"/> | <input type="checkbox"/> | 1   | <input type="checkbox"/> | Glass   |
|                                 | <input style="width: 90%;" type="text"/> | <input type="checkbox"/> | <input type="checkbox"/> | <input style="width: 90%;" type="text"/> | <input type="checkbox"/> | 2   | <input type="checkbox"/> | Bowl    |
|                                 | <input style="width: 90%;" type="text"/> | <input type="checkbox"/> | <input type="checkbox"/> | <input style="width: 90%;" type="text"/> | <input type="checkbox"/> | 3   | <input type="checkbox"/> | Plate   |
|                                 | <input style="width: 90%;" type="text"/> | <input type="checkbox"/> | <input type="checkbox"/> | <input style="width: 90%;" type="text"/> | <input type="checkbox"/> | 4   | <input type="checkbox"/> | Portion |

|                                               |                                          |                          |                          |                                          |                          |     |                          |         |
|-----------------------------------------------|------------------------------------------|--------------------------|--------------------------|------------------------------------------|--------------------------|-----|--------------------------|---------|
| Other<br>(sweets, biscuits,<br>chocolate ...) | <input style="width: 90%;" type="text"/> | <input type="checkbox"/> | <input type="checkbox"/> | <input style="width: 90%;" type="text"/> | <input type="checkbox"/> | 1/2 | <input type="checkbox"/> | Spoon   |
|                                               | <input style="width: 90%;" type="text"/> | <input type="checkbox"/> | <input type="checkbox"/> | <input style="width: 90%;" type="text"/> | <input type="checkbox"/> | 1   | <input type="checkbox"/> | Glass   |
|                                               | <input style="width: 90%;" type="text"/> | <input type="checkbox"/> | <input type="checkbox"/> | <input style="width: 90%;" type="text"/> | <input type="checkbox"/> | 2   | <input type="checkbox"/> | Bowl    |
|                                               | <input style="width: 90%;" type="text"/> | <input type="checkbox"/> | <input type="checkbox"/> | <input style="width: 90%;" type="text"/> | <input type="checkbox"/> | 3   | <input type="checkbox"/> | Plate   |
|                                               | <input style="width: 90%;" type="text"/> | <input type="checkbox"/> | <input type="checkbox"/> | <input style="width: 90%;" type="text"/> | <input type="checkbox"/> | 4   | <input type="checkbox"/> | Portion |

|                                         |                                          |                          |                          |                                          |                          |     |                          |         |
|-----------------------------------------|------------------------------------------|--------------------------|--------------------------|------------------------------------------|--------------------------|-----|--------------------------|---------|
| Trimnings<br>(Butter, cream,<br>Jam...) | <input style="width: 90%;" type="text"/> | <input type="checkbox"/> | <input type="checkbox"/> | <input style="width: 90%;" type="text"/> | <input type="checkbox"/> | 1/2 | <input type="checkbox"/> | Spoon   |
|                                         | <input style="width: 90%;" type="text"/> | <input type="checkbox"/> | <input type="checkbox"/> | <input style="width: 90%;" type="text"/> | <input type="checkbox"/> | 1   | <input type="checkbox"/> | Glass   |
|                                         | <input style="width: 90%;" type="text"/> | <input type="checkbox"/> | <input type="checkbox"/> | <input style="width: 90%;" type="text"/> | <input type="checkbox"/> | 2   | <input type="checkbox"/> | Bowl    |
|                                         | <input style="width: 90%;" type="text"/> | <input type="checkbox"/> | <input type="checkbox"/> | <input style="width: 90%;" type="text"/> | <input type="checkbox"/> | 3   | <input type="checkbox"/> | Plate   |
|                                         | <input style="width: 90%;" type="text"/> | <input type="checkbox"/> | <input type="checkbox"/> | <input style="width: 90%;" type="text"/> | <input type="checkbox"/> | 4   | <input type="checkbox"/> | Portion |



## Diet inquiry: Recall of the previous day (yesterday)

### Subject identification

|                   |                      |                      |                                          |
|-------------------|----------------------|----------------------|------------------------------------------|
| Study acronyme    | <input type="text"/> | Promotor name        | <input style="width: 95%;" type="text"/> |
| Subject code      | <input type="text"/> | Date of the inquiry  | <input style="width: 95%;" type="text"/> |
| Investigator name | <input type="text"/> | Name of the inquirer | <input style="width: 95%;" type="text"/> |

### Dinner consumption

Meal time

Meal location At home ☐ Outside   
Precise

|                            |                                                          | Home<br>made             | Trade mark                                                                                                                                                                                                                                                                                      |                                                                                                                                                      | Total consumption                                                                                                                                                       |  |  |
|----------------------------|----------------------------------------------------------|--------------------------|-------------------------------------------------------------------------------------------------------------------------------------------------------------------------------------------------------------------------------------------------------------------------------------------------|------------------------------------------------------------------------------------------------------------------------------------------------------|-------------------------------------------------------------------------------------------------------------------------------------------------------------------------|--|--|
| Starter                    | <input style="width: 240px; height: 50px;" type="text"/> | <input type="checkbox"/> | <input style="width: 60px;" type="text"/>                                                                                                                                                                                                                                                       | <input type="checkbox"/> 1/2<br><input type="checkbox"/> 1<br><input type="checkbox"/> 2<br><input type="checkbox"/> 3<br><input type="checkbox"/> 4 | <input type="checkbox"/> Spoon<br><input type="checkbox"/> Glass<br><input type="checkbox"/> Bowl<br><input type="checkbox"/> Plate<br><input type="checkbox"/> Portion |  |  |
| Meal 1                     | <input style="width: 240px; height: 50px;" type="text"/> | <input type="checkbox"/> | <input style="width: 60px;" type="text"/>                                                                                                                                                                                                                                                       | <input type="checkbox"/> 1/2<br><input type="checkbox"/> 1<br><input type="checkbox"/> 2<br><input type="checkbox"/> 3<br><input type="checkbox"/> 4 | <input type="checkbox"/> Spoon<br><input type="checkbox"/> Glass<br><input type="checkbox"/> Bowl<br><input type="checkbox"/> Plate<br><input type="checkbox"/> Portion |  |  |
| Meal 2                     | <input style="width: 240px; height: 50px;" type="text"/> | <input type="checkbox"/> | <input style="width: 60px;" type="text"/>                                                                                                                                                                                                                                                       | <input type="checkbox"/> 1/2<br><input type="checkbox"/> 1<br><input type="checkbox"/> 2<br><input type="checkbox"/> 3<br><input type="checkbox"/> 4 | <input type="checkbox"/> Spoon<br><input type="checkbox"/> Glass<br><input type="checkbox"/> Bowl<br><input type="checkbox"/> Plate<br><input type="checkbox"/> Portion |  |  |
| Meal 3                     | <input style="width: 240px; height: 50px;" type="text"/> | <input type="checkbox"/> | <input style="width: 60px;" type="text"/>                                                                                                                                                                                                                                                       | <input type="checkbox"/> 1/2<br><input type="checkbox"/> 1<br><input type="checkbox"/> 2<br><input type="checkbox"/> 3<br><input type="checkbox"/> 4 | <input type="checkbox"/> Spoon<br><input type="checkbox"/> Glass<br><input type="checkbox"/> Bowl<br><input type="checkbox"/> Plate<br><input type="checkbox"/> Portion |  |  |
| Cheese                     | <input style="width: 240px; height: 50px;" type="text"/> | <input type="checkbox"/> | <div style="border: 1px solid black; height: 20px; width: 100%;"></div> <div style="border: 1px solid black; height: 20px; width: 100%;"></div> <div style="border: 1px solid black; height: 20px; width: 100%;"></div> <div style="border: 1px solid black; height: 20px; width: 100%;"></div> | <input type="checkbox"/> 1/2<br><input type="checkbox"/> 1<br><input type="checkbox"/> 2<br><input type="checkbox"/> 3<br><input type="checkbox"/> 4 | <input type="checkbox"/> Spoon<br><input type="checkbox"/> Glass<br><input type="checkbox"/> Bowl<br><input type="checkbox"/> Plate<br><input type="checkbox"/> Portion |  |  |
| Dessert                    | <input style="width: 240px; height: 50px;" type="text"/> | <input type="checkbox"/> | <div style="border: 1px solid black; height: 20px; width: 100%;"></div> <div style="border: 1px solid black; height: 20px; width: 100%;"></div> <div style="border: 1px solid black; height: 20px; width: 100%;"></div> <div style="border: 1px solid black; height: 20px; width: 100%;"></div> | <input type="checkbox"/> 1/2<br><input type="checkbox"/> 1<br><input type="checkbox"/> 2<br><input type="checkbox"/> 3<br><input type="checkbox"/> 4 | <input type="checkbox"/> Spoon<br><input type="checkbox"/> Glass<br><input type="checkbox"/> Bowl<br><input type="checkbox"/> Plate<br><input type="checkbox"/> Portion |  |  |
| Trimnings<br>Sauce, bread, | <input style="width: 240px; height: 50px;" type="text"/> | <input type="checkbox"/> | <div style="border: 1px solid black; height: 20px; width: 100%;"></div> <div style="border: 1px solid black; height: 20px; width: 100%;"></div> <div style="border: 1px solid black; height: 20px; width: 100%;"></div> <div style="border: 1px solid black; height: 20px; width: 100%;"></div> | <input type="checkbox"/> 1/2<br><input type="checkbox"/> 1<br><input type="checkbox"/> 2<br><input type="checkbox"/> 3                               | <input type="checkbox"/> Spoon<br><input type="checkbox"/> Glass<br><input type="checkbox"/> Bowl<br><input type="checkbox"/> Plate                                     |  |  |

## Diet inquiry: Recall of the previous day (yesterday)

### Subject identification

|                   |                      |                      |                                          |
|-------------------|----------------------|----------------------|------------------------------------------|
| Study acronym     | <input type="text"/> | Promotor name        | <input style="width: 95%;" type="text"/> |
| Subject code      | <input type="text"/> | Date of the inquiry  | <input style="width: 95%;" type="text"/> |
| Investigator name | <input type="text"/> | Name of the inquirer | <input style="width: 95%;" type="text"/> |

### Dinner consumption

Meal time

|                                                               |                                                                         |                          |                                                                                                                                                                                                                                                                                                 |                                                                                                                                                                                                                                                                                                                                                                         |                         |                                                                                                                                                                                                                                                                                                                                                                         |                                             |
|---------------------------------------------------------------|-------------------------------------------------------------------------|--------------------------|-------------------------------------------------------------------------------------------------------------------------------------------------------------------------------------------------------------------------------------------------------------------------------------------------|-------------------------------------------------------------------------------------------------------------------------------------------------------------------------------------------------------------------------------------------------------------------------------------------------------------------------------------------------------------------------|-------------------------|-------------------------------------------------------------------------------------------------------------------------------------------------------------------------------------------------------------------------------------------------------------------------------------------------------------------------------------------------------------------------|---------------------------------------------|
| Alcoholic beverages                                           | <div style="border: 1px solid black; height: 50px; width: 100%;"></div> | <input type="checkbox"/> | <div style="border: 1px solid black; height: 40px; width: 100%;"></div> <div style="border: 1px solid black; height: 40px; width: 100%;"></div> <div style="border: 1px solid black; height: 40px; width: 100%;"></div> <div style="border: 1px solid black; height: 40px; width: 100%;"></div> | <div style="border: 1px solid black; height: 20px; width: 20px;"></div> <div style="border: 1px solid black; height: 20px; width: 20px;"></div> <div style="border: 1px solid black; height: 20px; width: 20px;"></div> <div style="border: 1px solid black; height: 20px; width: 20px;"></div> <div style="border: 1px solid black; height: 20px; width: 20px;"></div> | 1/2<br>1<br>2<br>3<br>4 | <div style="border: 1px solid black; height: 20px; width: 20px;"></div> <div style="border: 1px solid black; height: 20px; width: 20px;"></div> <div style="border: 1px solid black; height: 20px; width: 20px;"></div> <div style="border: 1px solid black; height: 20px; width: 20px;"></div> <div style="border: 1px solid black; height: 20px; width: 20px;"></div> | Spoon<br>Glass<br>Bowl<br>Plate<br>Portion  |
| Non-alcoholic beverages<br>(juice, soda, milk coffee, tea...) | <div style="border: 1px solid black; height: 50px; width: 100%;"></div> | <input type="checkbox"/> | <div style="border: 1px solid black; height: 40px; width: 100%;"></div> <div style="border: 1px solid black; height: 40px; width: 100%;"></div> <div style="border: 1px solid black; height: 40px; width: 100%;"></div> <div style="border: 1px solid black; height: 40px; width: 100%;"></div> | <div style="border: 1px solid black; height: 20px; width: 20px;"></div> <div style="border: 1px solid black; height: 20px; width: 20px;"></div> <div style="border: 1px solid black; height: 20px; width: 20px;"></div> <div style="border: 1px solid black; height: 20px; width: 20px;"></div> <div style="border: 1px solid black; height: 20px; width: 20px;"></div> | 1/2<br>1<br>2<br>3<br>4 | <div style="border: 1px solid black; height: 20px; width: 20px;"></div> <div style="border: 1px solid black; height: 20px; width: 20px;"></div> <div style="border: 1px solid black; height: 20px; width: 20px;"></div> <div style="border: 1px solid black; height: 20px; width: 20px;"></div> <div style="border: 1px solid black; height: 20px; width: 20px;"></div> | Spoon<br>Glass<br>Bowl<br>Bottle            |
| Water                                                         | <div style="border: 1px solid black; height: 50px; width: 100%;"></div> | <input type="checkbox"/> | <div style="border: 1px solid black; height: 40px; width: 100%;"></div> <div style="border: 1px solid black; height: 40px; width: 100%;"></div> <div style="border: 1px solid black; height: 40px; width: 100%;"></div> <div style="border: 1px solid black; height: 40px; width: 100%;"></div> | <div style="border: 1px solid black; height: 20px; width: 20px;"></div> <div style="border: 1px solid black; height: 20px; width: 20px;"></div> <div style="border: 1px solid black; height: 20px; width: 20px;"></div> <div style="border: 1px solid black; height: 20px; width: 20px;"></div> <div style="border: 1px solid black; height: 20px; width: 20px;"></div> | 1/2<br>1<br>2<br>3<br>4 | <div style="border: 1px solid black; height: 20px; width: 20px;"></div> <div style="border: 1px solid black; height: 20px; width: 20px;"></div> <div style="border: 1px solid black; height: 20px; width: 20px;"></div> <div style="border: 1px solid black; height: 20px; width: 20px;"></div> <div style="border: 1px solid black; height: 20px; width: 20px;"></div> | Spoon<br>Glass<br>Bowl<br>Bottle            |
| Others<br>(sweets, biscuits chocolate ...)                    | <div style="border: 1px solid black; height: 50px; width: 100%;"></div> | <input type="checkbox"/> | <div style="border: 1px solid black; height: 40px; width: 100%;"></div> <div style="border: 1px solid black; height: 40px; width: 100%;"></div> <div style="border: 1px solid black; height: 40px; width: 100%;"></div> <div style="border: 1px solid black; height: 40px; width: 100%;"></div> | <div style="border: 1px solid black; height: 20px; width: 20px;"></div> <div style="border: 1px solid black; height: 20px; width: 20px;"></div> <div style="border: 1px solid black; height: 20px; width: 20px;"></div> <div style="border: 1px solid black; height: 20px; width: 20px;"></div> <div style="border: 1px solid black; height: 20px; width: 20px;"></div> | 1/2<br>1<br>2<br>3<br>4 | <div style="border: 1px solid black; height: 20px; width: 20px;"></div> <div style="border: 1px solid black; height: 20px; width: 20px;"></div> <div style="border: 1px solid black; height: 20px; width: 20px;"></div> <div style="border: 1px solid black; height: 20px; width: 20px;"></div> <div style="border: 1px solid black; height: 20px; width: 20px;"></div> | Spoon<br>Unit<br>Handle<br>Plate<br>Portion |

## Diet inquiry: Recall of the previous day (yesterday)

### Subject identification

|                   |                      |                      |                                          |
|-------------------|----------------------|----------------------|------------------------------------------|
| Study acronyme    | <input type="text"/> | Promotor name        | <input style="width: 95%;" type="text"/> |
| Subject code      | <input type="text"/> | Date of the inquiry  | <input style="width: 95%;" type="text"/> |
| Investigator name | <input type="text"/> | Name of the inquirer | <input style="width: 95%;" type="text"/> |

### Lunch consumption

Meal time

Meal location At home ☐ Outside   
Precise

Home  
made

Trade mark

Total consumption

|                            |                                                          |                          |                                                          |                          |     |                          |         |
|----------------------------|----------------------------------------------------------|--------------------------|----------------------------------------------------------|--------------------------|-----|--------------------------|---------|
| Starter                    | <input style="width: 230px; height: 60px;" type="text"/> | <input type="checkbox"/> | <input style="width: 150px; height: 20px;" type="text"/> | <input type="checkbox"/> | 1/2 | <input type="checkbox"/> | Spoon   |
|                            |                                                          |                          |                                                          |                          | 1   | <input type="checkbox"/> | Glass   |
|                            |                                                          | <input type="checkbox"/> | <input style="width: 150px; height: 20px;" type="text"/> |                          | 2   | <input type="checkbox"/> | Bowl    |
|                            |                                                          |                          |                                                          |                          | 3   | <input type="checkbox"/> | Plate   |
|                            |                                                          | <input type="checkbox"/> | <input style="width: 150px; height: 20px;" type="text"/> |                          | 4   | <input type="checkbox"/> | Portion |
| Meal 1                     | <input style="width: 230px; height: 45px;" type="text"/> | <input type="checkbox"/> | <input style="width: 150px; height: 20px;" type="text"/> |                          | 1/2 | <input type="checkbox"/> | Spoon   |
|                            |                                                          |                          |                                                          |                          | 1   | <input type="checkbox"/> | Glass   |
|                            |                                                          |                          |                                                          |                          | 2   | <input type="checkbox"/> | Bowl    |
|                            |                                                          |                          |                                                          |                          | 3   | <input type="checkbox"/> | Plate   |
|                            |                                                          |                          |                                                          |                          | 4   | <input type="checkbox"/> | Portion |
| Meal 2                     | <input style="width: 230px; height: 45px;" type="text"/> | <input type="checkbox"/> | <input style="width: 150px; height: 20px;" type="text"/> |                          | 1/2 | <input type="checkbox"/> | Spoon   |
|                            |                                                          |                          |                                                          |                          | 1   | <input type="checkbox"/> | Glass   |
|                            |                                                          |                          |                                                          |                          | 2   | <input type="checkbox"/> | Bowl    |
|                            |                                                          |                          |                                                          |                          | 3   | <input type="checkbox"/> | Plate   |
|                            |                                                          |                          |                                                          |                          | 4   | <input type="checkbox"/> | Portion |
| Meal 3                     | <input style="width: 230px; height: 45px;" type="text"/> | <input type="checkbox"/> | <input style="width: 150px; height: 20px;" type="text"/> |                          | 1/2 | <input type="checkbox"/> | Spoon   |
|                            |                                                          |                          |                                                          |                          | 1   | <input type="checkbox"/> | Glass   |
|                            |                                                          |                          |                                                          |                          | 2   | <input type="checkbox"/> | Bowl    |
|                            |                                                          |                          |                                                          |                          | 3   | <input type="checkbox"/> | Plate   |
|                            |                                                          |                          |                                                          |                          | 4   | <input type="checkbox"/> | Portion |
| Cheese                     | <input style="width: 230px; height: 55px;" type="text"/> | <input type="checkbox"/> | <input style="width: 150px; height: 20px;" type="text"/> |                          | 1/2 | <input type="checkbox"/> | Spoon   |
|                            |                                                          |                          | <input style="width: 150px; height: 20px;" type="text"/> |                          | 1   | <input type="checkbox"/> | Glass   |
|                            |                                                          |                          | <input style="width: 150px; height: 20px;" type="text"/> |                          | 2   | <input type="checkbox"/> | Bowl    |
|                            |                                                          |                          | <input style="width: 150px; height: 20px;" type="text"/> |                          | 3   | <input type="checkbox"/> | Plate   |
|                            |                                                          |                          | <input style="width: 150px; height: 20px;" type="text"/> |                          | 4   | <input type="checkbox"/> | Portion |
| Dessert                    | <input style="width: 230px; height: 55px;" type="text"/> | <input type="checkbox"/> | <input style="width: 150px; height: 20px;" type="text"/> |                          | 1/2 | <input type="checkbox"/> | Spoon   |
|                            |                                                          |                          | <input style="width: 150px; height: 20px;" type="text"/> |                          | 1   | <input type="checkbox"/> | Glass   |
|                            |                                                          |                          | <input style="width: 150px; height: 20px;" type="text"/> |                          | 2   | <input type="checkbox"/> | Bowl    |
|                            |                                                          |                          | <input style="width: 150px; height: 20px;" type="text"/> |                          | 3   | <input type="checkbox"/> | Plate   |
|                            |                                                          |                          | <input style="width: 150px; height: 20px;" type="text"/> |                          | 4   | <input type="checkbox"/> | Portion |
| Trimnings<br>Sauce, bread, | <input style="width: 230px; height: 55px;" type="text"/> | <input type="checkbox"/> | <input style="width: 150px; height: 20px;" type="text"/> |                          | 1/2 | <input type="checkbox"/> | Spoon   |
|                            |                                                          |                          | <input style="width: 150px; height: 20px;" type="text"/> |                          | 1   | <input type="checkbox"/> | Toast   |
|                            |                                                          |                          | <input style="width: 150px; height: 20px;" type="text"/> |                          | 2   | <input type="checkbox"/> | Bowl    |
|                            |                                                          |                          | <input style="width: 150px; height: 20px;" type="text"/> |                          | 3   | <input type="checkbox"/> | Plate   |

## Diet inquiry: Recall of the previous day (yesterday)

### Subject identification

|                   |                      |                      |                      |
|-------------------|----------------------|----------------------|----------------------|
| Study acronym     | <input type="text"/> | Promotor name        | <input type="text"/> |
| Subject code      | <input type="text"/> | Date of the inquiry  | <input type="text"/> |
| Investigator name | <input type="text"/> | Name of the inquirer | <input type="text"/> |

### Lunch consumption (following)

Meal time

|                                                               |                                            |                          |                                                                                                                                                                                      |                                                                                                                                          |                         |                                                                                                                                          |                                             |
|---------------------------------------------------------------|--------------------------------------------|--------------------------|--------------------------------------------------------------------------------------------------------------------------------------------------------------------------------------|------------------------------------------------------------------------------------------------------------------------------------------|-------------------------|------------------------------------------------------------------------------------------------------------------------------------------|---------------------------------------------|
| Alcoholic beverages                                           | <input style="height: 60px;" type="text"/> | <input type="checkbox"/> | <input style="height: 40px;" type="text"/><br><input style="height: 40px;" type="text"/><br><input style="height: 40px;" type="text"/><br><input style="height: 40px;" type="text"/> | <input type="checkbox"/><br><input type="checkbox"/><br><input type="checkbox"/><br><input type="checkbox"/><br><input type="checkbox"/> | 1/2<br>1<br>2<br>3<br>4 | <input type="checkbox"/><br><input type="checkbox"/><br><input type="checkbox"/><br><input type="checkbox"/><br><input type="checkbox"/> | Glass<br>Mug<br>Bowl<br>Bottle              |
| Non-alcoholic beverages<br>(juice, soda, milk coffee, tea...) | <input style="height: 60px;" type="text"/> | <input type="checkbox"/> | <input style="height: 40px;" type="text"/><br><input style="height: 40px;" type="text"/><br><input style="height: 40px;" type="text"/><br><input style="height: 40px;" type="text"/> | <input type="checkbox"/><br><input type="checkbox"/><br><input type="checkbox"/><br><input type="checkbox"/><br><input type="checkbox"/> | 1/2<br>1<br>2<br>3<br>4 | <input type="checkbox"/><br><input type="checkbox"/><br><input type="checkbox"/><br><input type="checkbox"/><br><input type="checkbox"/> | Glass<br>Mug<br>Bowl<br>Bottle              |
| Water                                                         | <input style="height: 60px;" type="text"/> | <input type="checkbox"/> | <input style="height: 40px;" type="text"/><br><input style="height: 40px;" type="text"/><br><input style="height: 40px;" type="text"/><br><input style="height: 40px;" type="text"/> | <input type="checkbox"/><br><input type="checkbox"/><br><input type="checkbox"/><br><input type="checkbox"/><br><input type="checkbox"/> | 1/2<br>1<br>2<br>3<br>4 | <input type="checkbox"/><br><input type="checkbox"/><br><input type="checkbox"/><br><input type="checkbox"/><br><input type="checkbox"/> | Glass<br>Mug<br>Bowl<br>Bottle              |
| Others<br>(sweets, biscuits chocolate ...)                    | <input style="height: 60px;" type="text"/> | <input type="checkbox"/> | <input style="height: 40px;" type="text"/><br><input style="height: 40px;" type="text"/><br><input style="height: 40px;" type="text"/><br><input style="height: 40px;" type="text"/> | <input type="checkbox"/><br><input type="checkbox"/><br><input type="checkbox"/><br><input type="checkbox"/><br><input type="checkbox"/> | 1/2<br>1<br>2<br>3<br>4 | <input type="checkbox"/><br><input type="checkbox"/><br><input type="checkbox"/><br><input type="checkbox"/><br><input type="checkbox"/> | Spoon<br>Unit<br>Handle<br>Plate<br>Portion |



## INFORMATION NOTE – HEALTHY VOLUNTEERS

**Comparative study of natural phytoestrogens in the circulating blood and urine of patients affected by acute systemic lupus erythematosus with patients suffering from other autoimmune diseases and healthy volunteers**

*ISOLED – CHUBX2017/08*

Promotor of the study: **CHU de Bordeaux**  
Main investigator: **Pr Jean-François VIALARD**

Dear,

An investigator invites you to take part in clinical research sponsored by the Bordeaux University Hospital. Before making a decision, it is important that you carefully read these pages which will provide you with the necessary information concerning the different aspects of this research. Do not hesitate to ask any questions you deem useful to your investigator.

### Why doing this research?

Systemic lupus erythematosus occurs in 90% of cases in women and 90% of them are of childbearing age. The characteristic of these women, compared to men or postmenopausal women, is that they manufacture estrogen. Studies conducted around the world on lupus have shown that estrogen, whether endogenous (made during the female cycle) or exogenous (coming from birth control pills or hormonal treatments for menopause) can be associated with flare-ups of disease. These drug treatments are therefore not recommended for lupus patients.

However, other estrogens exist in the patient's environment which are referred to as endocrine disruptors. Among the endocrine disrupting estrogens are synthetic substances but also natural substances. Dietary phytoestrogens are thus among the most powerful endocrine disruptors with estrogenic effects known today. The quantities provided by food can vary greatly from one consumption to another.

Lupus pathology evolves in flare-ups and the phenomena at the origin of these flare-ups are still unknown. It is likely that unstudied environmental factors may be the cause of some of these flare-ups. The study aims to investigate whether regular or occasional consumption of phytoestrogens could be the cause of disease flare-ups. If this is the case, dietary recommendations could be systematically given to lupus patients.

To validate the possible role of phytoestrogens in lupus disease, we also need to measure them in control groups of healthy subjects.

### What is the purpose of this research?

The study will seek to determine whether patients who consult for the discovery of systemic lupus erythematosus or for a lupus flare have recently consumed phytoestrogens. Blood and urine samples, as well as a lock of hair will be used to measure phytoestrogens to confirm exposure. A food questionnaire will determine the habits of the patients but also their recent consumption.

### How will this research unfold?

The study will take place within the Internal Medicine and Rheumatology departments at the Bordeaux University Hospital specializing in the care of patients with systemic acute lupus erythematosus. It is planned to involve 30 lupus patients, 40 patients with another autoimmune disease (control group) and 30 healthy volunteers over a forecast period of 2 years.

For each healthy volunteer, a total compensation of €30 will be paid at the end of the research.

### Who can participate?

To participate in this study, you must be at least 18 years old, affiliated or beneficiary of a social security scheme. You must not have any autoimmune disease, and not have any exclusion criteria defined by the protocol such as: being pregnant or breastfeeding, being postmenopausal or being affected by the HIV or hepatitis B or C viruses..



Thus, as part of this study, HIV, hepatitis B or C serologies will be carried out, as well as a search for anti-nucleus antibodies. If one of these results is positive, you will be immediately informed of the result and a specialist consultation will then be advised.

### **What will you be asked?**

After reading this information note and talking with your doctor, you will have a reflection period after which you will have to sign your consent form if you decide to take part in this study.

After signing the consent form, a blood test will be carried out and 4 additional tubes of blood, a urine sample and a strand of hair for research will be taken. You will also be asked to complete an eating habits questionnaire and a 48-hour reminder (about 20 minutes).

The table below describes the visit process:.

|                                     | Pre-inclusion<br>(J-2 to M-1) | Inclusion<br>T 0 <sup>2</sup> |
|-------------------------------------|-------------------------------|-------------------------------|
| Information on the research project | ✓                             |                               |
| Check of the inclusion criteria     | ✓                             | ✓                             |
| Collection of informed consent      |                               | ✓                             |
| Clinical examination                |                               | ✓                             |
| Biology checking <sup>1</sup>       |                               | ✓                             |
| bHCG measurements                   |                               | ✓                             |
| Dietary inquiry (average 20 min)    |                               | ✓                             |
| Biological sampling <sup>2</sup>    |                               | ✓                             |

<sup>2</sup> If possible 1 week after start of menstrual bleeding

<sup>1</sup> Biology checking : HIV serology, B and C hepatitis nuclear antibody analysis.

<sup>2</sup> 4 blood tubes (i.e. 25ml) and a urine sample (10 ml) and a hair sample (a pen diameter).

### **The study includes a biological collection**

The samples taken will constitute a bank of serum, plasma, DNA, urine and hair kept as part of this research, to meet the objective of the latter under the responsibility of Pr Jean-François Viillard, principal investigator of the research, and responsible for the collection. This collection will be produced in accordance with the regulations and declared to the competent authorities.

The collection will be kept in the Biological Resource Center of the Bordeaux University Hospital located in Tondou, Place Amélie Raba-Léon 33076 Bordeaux Cedex. The data corresponding to the samples taken will be anonymized.

At the end of the research, the collection of biological samples constituted can be used for possible future studies.

You are free to refuse to participate in this collection and you can therefore request the destruction of your blood samples at any time.

You will be able to be informed of the results obtained and of the fate of your samples, including in the event that you no longer wish to take part in this research.

### **Role of genetic determinants**

Some research on your biological samples may focus on the role of genetic determinants; which will require an examination of your genetic characteristics without an identifying purpose. For this research your written consent is required. You can express this by signing a specific consent which will be given to you by your doctor.

### **What are the expected benefits?**

If the hypothesis tested in this study turns out to be correct, that is to say that the intake of phytoestrogens is linked to the declaration of LEAD or to the appearance of lupus flare-ups, dietary advice will be given to patients. lupus and help in identifying risk-inducing products will be provided. This information will help reduce the incidence of relapses.

The research in which you will participate therefore has a vocation of secondary prevention. Ultimately, the demonstration of the aggravating effects of phyto-oestrogens on LEAD could lead to a review of the regulations on these compounds and encourage manufacturers to reduce the phyto-oestrogen content of food.



### **What are the possible disadvantages?**

We will ask you to take four (4) additional tubes of blood (approximately 25ml), 10ml of urine and a lock of hair on inclusion in the study for the constitution of the biological collection necessary for this research.

This additional sample of approximately 25 ml of blood will have no impact on your state of health. There will be no trial of treatment and no invasive examination as part of this study.

### **What are your rights ?**

The investigator who offers you to take part in this research must provide you with all the necessary explanations concerning this research. If you wish to withdraw from it at any time whatsoever, and for whatever reason, without having to justify yourself.

If during the research, you no longer wish to participate, the data / samples collected before the withdrawal of your consent may be kept and used in the context of the research, unless you object. In this case, they will be destroyed.

### **Confidentiality and processing of personal data**

As part of the research, computer processing of your personal data will be implemented to allow analysis of the results of the research with regard to the objectives presented to you.

The data controller is Bordeaux University Hospital.

The study investigator and other authorized study personnel will collect information about you and after obtaining your consent. Only the information strictly necessary for the purpose of the research will be collected. This information will relate to your health and your participation in the study. They may also concern special categories of personal data such as genetic data, lifestyle and ethnic origin if the collection of this data is justified by the study. This information is reported on files specific to the study, called observation books, provided by the Promoter.

The collection of this data will be done for the purposes of scientific research and their processing will have the purpose of meeting the objectives of this research.

These data will be kept for the duration of the study until the final report or until the last publication and then archived for a period in accordance with the regulations..

In order to ensure the confidentiality of your personal information, neither your name nor any other information which would make it possible to identify you directly will be entered in the observation notebook or any other file or sample that the investigator of the study will provide, to the Promoter or authorized representatives of the Promoter. You will only be identified by a code and your initials. The code is used so that the study investigator can identify you if necessary. This data will be stored on secure computer servers.

In accordance with the provisions of the law relating to data processing, files and freedoms (law n° 78-17 of January 6, 1978 relating to data processing, files and freedoms modified by law n° 2018-493 of 20 June 2018 relating to the protection of personal data) and the General Data Protection Regulation (EU Regulation 2016/679), you have the right to access and rectify your personal information. In some cases, you can also request the restriction of the processing of your personal information, object to certain types of processing, request that your personal information be erased and request that your personal information be provided to you, or provided to a third party, in a digital format (right of portability). In accordance with the law, certain data collected may not be deleted if this deletion makes it impossible or seriously compromises the achievement of the research objectives. You can exercise these rights by requesting it in writing from the study investigator who will forward the request to the sponsor. The promoter will respond to your requests in accordance with its legal and regulatory obligations.

The Promoter may disclose personal information to regulatory agencies or its research partners. These people, companies and agencies may be located in France, other European Economic Area (EEA) countries, the United States and other countries outside the EEA. It is possible that some countries outside the EEA do not offer the same level of privacy protection as in France. In this case, the Promoter will however maintain the confidentiality of all personal information that it exchanges within the limits of the law. The Promoter will adopt appropriate contractual measures relating to the protection and transfer of data, to ensure that the relevant recipients outside the EEA provide an adequate level of protection regarding your personal information and in accordance with the law.

You have the right to object to the transmission of data covered by professional secrecy that may be used in the context of this research and to be processed. You can also access all of your medical data directly or through the doctor of your choice in accordance with the provisions of Article L1111-7 of the Public Health Code. These rights are exercised with the doctor who follows you in the context of the research and who knows your identity.

The competent authorities and the Sponsor or its authorized representatives may also need to access your medical records and your study file, in order to verify the quality of the data collected within the framework of the study.

Your coded personal information may be used for other scientific research on your disease or other diseases always in accordance with applicable laws and regulations.



For any questions about the processing of your personal data or your rights associated with this data, you can contact the data protection officer of the Bordeaux University Hospital (dpo@chu-bordeaux.fr).

If, despite the measures put in place by the Promoter, you believe that your rights have not been respected, you can file a complaint with the data protection supervisory authority, the Commission Nationale de l'Informatique et des Libertés (CNIL).

Regulatory Considerations:

In accordance with law n°2012-300 of March 5, 2012 relating to research involving the human person:

- this research obtained the favorable opinion of the Committee for the Protection of People Ile de France V and was the subject of information from the National Agency for the Safety of Medicines and Health Products (ANSM),
- the Promoter of this research, the Bordeaux University Hospital (12, rue Dubernat, 33404 Talence cedex), has taken out civil liability insurance with HDI Global SE (n°0100665414025-170026),
- the Promoter assumes compensation for the harmful consequences of the research involving the human person.

Search results :

When this research is complete, you will be personally informed of the overall results by your doctor as soon as these are available and if you wish.

After reading this information note, feel free to ask your investigator any questions you want. After a period of reflection, if you agree to participate in this research, you must complete and sign the consent to participate form. A copy of the complete document will be given to you.

Thank you for your attention to this information note..

## INFORMED CONSENT FORM – HEALTHY VOLUNTEERS

**Comparative study of natural phytoestrogens in the circulating blood and urine of patients affected by acute systemic lupus erythematosus with patients suffering from other autoimmune diseases and healthy volunteers**

*ISOLED – CHUBX2017/08*

Promotor of the study: **CHU de Bordeaux**  
Main investigator: **Pr Jean-François VIALARD**

I, the undersigned) ..... (surname, first name) certify that I have read and understood the information note that was given to me.

I had the opportunity to ask all the questions I wanted to Pr/Dr ..... (surname, first name) who explained to me the nature, the objectives, the potential risks and the constraints linked to my participation in this research.

I am aware of the possibility reserved for me to interrupt my participation in this research at any time without having to justify my decision and I will do my best to inform the investigator who is following me in the research.

I had the assurance that the decisions necessary for my health will be taken at all times, in accordance with the current state of medical knowledge.

I am aware that this research has received the favorable opinion of a Committee for the Protection of Persons and has been the subject of information from the ANSM.

The Bordeaux University Hospital has signed a commitment to comply with the "Reference Methodology" (MR-001) pursuant to the provisions of Article 54 paragraph 5 of the amended law of January 6, 1978 relating to information, files and to freedoms.

The sponsor of the research (CHU de Bordeaux, 12 rue Dubernat 33404 Talence Cedex) has taken out civil liability insurance in the event of damage with the company HDI Global SE.

I agree that the people who collaborate in this research or who are mandated by the sponsor, as well as possibly the representative of the Health Authorities, have access to the information with the strictest respect for confidentiality.

I accept that the data recorded during this research may be subject to computerized processing under the responsibility of the promoter. I am informed that at the end of this research, these data may be used for other research purposes (new statistical analyses) and I have been informed of my right to oppose.

I am informed of the possibility that part of the samples taken during this research protocol will be kept for 5 years for subsequent use for research purposes and I have been informed of my right to oppose it.

I am informed that part of the samples taken during this research protocol will be kept in a biobank for 5 years for research purposes. I have been informed of my right to consent or not.

I have noted that, in accordance with the General Data Protection Regulations (GDPR) and the provisions of the law relating to data processing, files and freedoms, I have a right of access, rectification, deletion, limitation of processing, data portability, opposition and withdrawal. These rights are exercised with the investigator who follows me in the context of this research and who knows my identity.

My consent in no way relieves the investigator and the research sponsor of their responsibilities towards me. I retain all rights guaranteed by law.

The overall results of the research will be communicated to me directly, if I so wish, in accordance with the law of March 4, 2002 relating to the rights of patients and the quality of the health system.

**Having had sufficient time to reflect before making my decision, I freely and voluntarily agree to participate in the ISOLED research**

**I freely and voluntarily agree that my data (including biological) may be stored and used for other research purposes (new statistical analyses)** ☐ yes ☐ no

**I may at any time request additional information from the investigator who offered me to participate in this research, telephone number:**

Done in: ..... on:

Signature of the participant :

Done in: ..... on:

Signature of the investigator :
